# Supplementary material for: Need for support among healthcare professionals during the COVID-19 pandemic: a qualitative study at an academic hospital in the Netherlands
Source: PubMed Central journal article supplement — BMJ Open. 2022 Feb 24;12(2):e059124. doi: 10.1136/bmjopen-2021-059124 (PMC8882635; doi:10.1136/bmjopen-2021-059124), 2022-02-24
Supplement: bmjopen-2021-059124.draft_revisions.pdf [file bmjopen-2021-059124.draft_revisions.pdf]

# BMJ Open

BMJ Open is committed to open peer review. As part of this commitment we make the peer review history of every article we publish publicly available.

When an article is published we post the peer reviewers' comments and the authors' responses online. We also post the versions of the paper that were used during peer review. These are the versions that the peer review comments apply to.

The versions of the paper that follow are the versions that were submitted during the peer review process. They are not the versions of record or the final published versions. They should not be cited or distributed as the published version of this manuscript.

BMJ Open is an open access journal and the full, final, typeset and author-corrected version of record of the manuscript is available on our site with no access controls, subscription charges or pay-per-view fees (<http://bmjopen.bmj.com>).

If you have any questions on BMJ Open's open peer review process please email [info.bmjopen@bmj.com](mailto:info.bmjopen@bmj.com)

# BMJ Open

## The need for support among healthcare professionals during COVID-19 pandemic: a mixed methods study

|                               |                                                                                                                                                                                                                                                                                                                                                                                                                                                                                                                                                                                                                                                                                                                                                                                                                                                              |
|-------------------------------|--------------------------------------------------------------------------------------------------------------------------------------------------------------------------------------------------------------------------------------------------------------------------------------------------------------------------------------------------------------------------------------------------------------------------------------------------------------------------------------------------------------------------------------------------------------------------------------------------------------------------------------------------------------------------------------------------------------------------------------------------------------------------------------------------------------------------------------------------------------|
| Journal:                      | <i>BMJ Open</i>                                                                                                                                                                                                                                                                                                                                                                                                                                                                                                                                                                                                                                                                                                                                                                                                                                              |
| Manuscript ID                 | bmjopen-2021-059124                                                                                                                                                                                                                                                                                                                                                                                                                                                                                                                                                                                                                                                                                                                                                                                                                                          |
| Article Type:                 | Original research                                                                                                                                                                                                                                                                                                                                                                                                                                                                                                                                                                                                                                                                                                                                                                                                                                            |
| Date Submitted by the Author: | 08-Nov-2021                                                                                                                                                                                                                                                                                                                                                                                                                                                                                                                                                                                                                                                                                                                                                                                                                                                  |
| Complete List of Authors:     | Kranenburg, Leonieke; Erasmus Medical Center, Department of Psychiatry, section Medical Psychology<br>de Veer, Mathijs; Erasmus Medical Center, Department of Psychiatry, section Medical Psychology<br>Oude Hengel, Karen; Erasmus Medical Center, Department of Public Health; Netherlands Organization for Applied Scientific Research TNO, Department of Work, Health and Technology<br>Kouwenhoven-Pasmooij, T.A.; Erasmus Medical Center, Department of Occupational Health<br>de Pagter, Anne; Erasmus MC Sophia Children Hospital, Challenge&Support programme<br>Hoogendijk, Witte; Erasmus Medical Center, Department of Psychiatry, section Medical Psychology<br>Busschbach, Jan; Erasmus Medical Center, Department of Psychiatry, Section of Medical Psychology<br>Van Mol, Margo; Erasmus Medical Center, Department of Intensive Care Adults |
| Keywords:                     | COVID-19, MENTAL HEALTH, QUALITATIVE RESEARCH                                                                                                                                                                                                                                                                                                                                                                                                                                                                                                                                                                                                                                                                                                                                                                                                                |
|                               |                                                                                                                                                                                                                                                                                                                                                                                                                                                                                                                                                                                                                                                                                                                                                                                                                                                              |

SCHOLARONE™  
Manuscripts

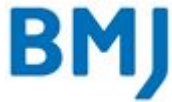

I, the Submitting Author has the right to grant and does grant on behalf of all authors of the Work (as defined in the below author licence), an exclusive licence and/or a non-exclusive licence for contributions from authors who are: i) UK Crown employees; ii) where BMJ has agreed a CC-BY licence shall apply, and/or iii) in accordance with the terms applicable for US Federal Government officers or employees acting as part of their official duties; on a worldwide, perpetual, irrevocable, royalty-free basis to BMJ Publishing Group Ltd ("BMJ") its licensees and where the relevant Journal is co-owned by BMJ to the co-owners of the Journal, to publish the Work in this journal and any other BMJ products and to exploit all rights, as set out in our [licence](#).

The Submitting Author accepts and understands that any supply made under these terms is made by BMJ to the Submitting Author unless you are acting as an employee on behalf of your employer or a postgraduate student of an affiliated institution which is paying any applicable article publishing charge ("APC") for Open Access articles. Where the Submitting Author wishes to make the Work available on an Open Access basis (and intends to pay the relevant APC), the terms of reuse of such Open Access shall be governed by a Creative Commons licence – details of these licences and which [Creative Commons](#) licence will apply to this Work are set out in our licence referred to above.

Other than as permitted in any relevant BMJ Author's Self Archiving Policies, I confirm this Work has not been accepted for publication elsewhere, is not being considered for publication elsewhere and does not duplicate material already published. I confirm all authors consent to publication of this Work and authorise the granting of this licence.

1  
2  
3 1 **The need for support among healthcare professionals during COVID-19**  
4  
5  
6 2 **pandemic: a mixed methods study**  
7  
8  
9 3

10 4 Kranenburg LW<sup>1\*</sup>, de Veer MR<sup>1</sup>, Oude Hengel KM<sup>2,3</sup>, Kouwenhoven-Pasmooij TA<sup>4</sup>, de Pagter APJ<sup>5</sup>,  
11  
12  
13 5 Hoogendijk WJG<sup>1</sup>, Busschbach JJ<sup>1</sup>, van Mol MMC<sup>6</sup>  
14  
15 6

16  
17  
18 7 1. Department of Psychiatry, Erasmus University Medical Center, Rotterdam, the Netherlands  
19

20 8 2. Department of Public Health, Erasmus University Medical Center, Rotterdam, the Netherlands  
21

22 9 3. Department of Work, Health and Technology, Netherlands Organisation for Applied Scientific  
23

24 10 Research TNO, Schipholweg 79-86, 2316, Leiden, The Netherlands.  
25

26  
27 11 4. Department of Occupational Health, Erasmus University Medical Center, Rotterdam, the  
28

29 12 Netherlands  
30

31 13 5. Challenge&Support programme, Sophia Childrens Hospital, Erasmus MC University Medical Center,  
32

33 14 Rotterdam, the Netherlands  
34

35 15 6. Department of Intensive Care Adults, Erasmus MC University Medical Center, Rotterdam, the  
36

37 16 Netherlands.  
38  
39  
40

41 17 *\* Corresponding author:*  
42

43 18 Leonieke Kranenburg  
44

45 19 Erasmus University Medical Center  
46

47 20 Department of Psychiatry  
48

49 21 P.O. Box 2040, 3000 CA, Rotterdam, the Netherlands  
50

51 22 Email address: [l.kranenburg@erasmusmc.nl](mailto:l.kranenburg@erasmusmc.nl)  
52  
53  
54 23

55  
56 24 *Short title:*  
57

58  
59 25 Need for support in healthcare professionals during COVID-19.  
60

## Abstract

### *Objectives*

The aim of the current study is to gain insight in the factors that benefit vitality and resilience of healthcare workers during the COVID-19 pandemic, to develop and direct specific support strategies.

### *Design, setting, participants*

This study applies a mixed-methods design. The qualitative part consisted of a focus-group interview study among frontline health care workers in a large Dutch academic hospital. Included were professionals of the intensive care unit, COVID-19 departments, infection prevention units and facility management services. In addition, a survey on support needs was send out to all workers in the same hospital.

### *Outcomes measures*

Thematic content analysis was applied to focus group data to gain insight in the factors that contribute to maintaining vitality and resilience, and to assess specific support needs. Survey data were analysed with descriptive statistics.

### *Results*

Qualitative data-analysis of the focus groups resulted in a model on the factors that contribute to maintaining resilience and vitality. The model stretches over two axes: one ranging from a healthy basis to adequate professional functioning and the other from individual to organization, resulting in four quadrants: recharge and recover (healthy basis, individual), safety and connectedness at work (healthy basis, organizational), collaboration (professional functioning, organizational) and professional identity (professional functioning, individual). Each quadrant contains several themes, and in total fourteen individual themes were identified. Outcomes from the needs assessment survey (n=479) were in line with these findings: at an individual level, a healthy life style was named as most important, whereas at the organizational level the most frequent named needs included appreciation, (decreasing) work load and a proper workplace at home.

1  
2  
3 51 *Conclusion*

4  
5 52 Areas for organizational interventions to increase vitality and resilience among healthcare  
6  
7 53 professionals are: consistent communication, realistic job performance expectations, monitor and  
8  
9 54 improve mental resilience, showing appreciation and act upon practical support requests.  
10  
11

12  
13 55 *Keywords*

14  
15 56 COVID-19, Mental Health, Qualitative Research  
16  
17

18 57

19  
20  
21 58 **Article summary**

22  
23  
24 59 *Strengths and limitations of this study*

- 25  
26 60
- 27 • This study goes beyond merely assessing stress and mental health complaints of health care  
28 professionals during the COVID-19 pandemic.
  - 29 61 • A mixed-methods design was applied to study the specific support needs of both hospital and  
30 homeworkers.
  - 31 62 • Study insights are summarized in a concise conceptual model, which suggests feasible  
32 interventions to meet health care professionals' support needs .
  - 33 63
  - 34 64 • However, the effectiveness of the proposed interventions has not been tested yet.  
35  
36  
37  
38  
39  
40  
41  
42  
43  
44  
45  
46  
47  
48  
49  
50  
51  
52  
53  
54  
55  
56  
57  
58  
59  
60

68

69

70

## Introduction

The Coronavirus Disease 2019 (COVID-19) pandemic had a significant impact on the physical and mental functioning of healthcare professionals[1-6]. The need for high-intensity medical care rapidly increased during the COVID-19 pandemic, resulting in stressful work circumstances[7]. First, at the departments in direct contact with COVID-19 patients, professionals were confronted with the intensity of continuously wearing personal protective equipment, changes in responsibilities and tasks, moral dilemmas, and the risk of infection for the healthcare professionals themselves and consequently their families[8-15]. Interpersonal contact with patients' family members, one of the core features of the professional practice of nurses, was dramatically reduced due to visiting limitations in most hospitals[16, 17]. This sudden shift in activities and responsibilities required additional competences to maintain high-quality healthcare. Second, professionals at non-COVID-19 departments were confronted with a sudden change of or reduction in tasks, as all focus was on the COVID-19 departments. This resulted in delay of treatment of non-COVID-19 healthcare problems and scheduled appointments including increased waiting times[18-20]. Third, the COVID-19 pandemic not only impacted the health care workers within hospitals, but also hospital workers who suddenly had to work from home. In addition to the temporary loss of the work environment and direct contact with colleagues, homeworkers might lack a sense of purpose, solidarity and valuable contribution to the crisis situation[21].

In the short-term, work-related stressors can cause fatigue, sleep disorders, mistakes and moral distress[22]. Long-term effects of high work pressure include burnout, depression and post-traumatic stress disorder, which may result in dropout due to sick leave or abandonment of paid employment[23-25]. These adverse outcomes can be counterbalanced by vitality, resilience and job satisfaction of professionals[26, 27]. Strengthening of these aspects may positively influence health care professionals' retention for work, which may be even more necessary in times of crisis[28-30].

1  
2  
3 96 Therefore, the aim of the current study is to gain insight in the factors that benefit vitality and  
4  
5 97 resilience, to develop and direct support strategies that meet healthcare professionals' needs.  
6  
7 98

## 10 99 **Materials and methods**

### 13 100 **Study design**

16 101 A mixed-methods design was applied. The study consisted of a focus group study and an online  
17  
18 102 survey, carried out in the Erasmus University Medical Center, a large academic hospital in the  
19  
20 103 Netherlands. The study protocol is described in detail in this journal (see S2 Appendix)[31]. For the  
21  
22 104 purpose of this article, we mainly report on the focus group study, combined with the quantitative  
23  
24 105 results that addressed healthcare professionals' needs. The study was conducted in October and  
25  
26 106 November 2020, during the second wave of the COVID-19 pandemic. The study was supported by the  
27  
28 107 hospital Board of Directors and approved by the Erasmus MC Medical Ethics Committee (MEC-2020-  
29  
30 108 0705).

### 34 109 **Patient and Public Involvement**

36 110 Patients and the public were not involved in the design and conduct of this study.  
37  
38 111

### 42 112 **Focus groups**

#### 45 113 **Participants**

47 114 Intended groups for the focus groups were: professionals from the intensive care unit (ICU), the  
48  
49 115 COVID-19 department, the infection prevention unit and workers of the facility management  
50  
51 116 services. Participants were selected and invited by the research team in collaboration with the team-  
52  
53 117 or division managers. Intended group size was a minimum of four and a maximum of eight  
54  
55 118 participants. Participation was voluntary and all participants provided written informed consent.  
56  
57 119 Focus groups were led by LK, with the support of MM. Both are female senior investigators with a  
58  
59  
60



1  
2  
3 120 background in psychology. Both are clinicians as well, one in the field of psychiatry (LK) and the other  
4  
5 121 in the field of ICU nursing (MM).

### 8 122 **Measures**

9  
10 123 Based on the literature, a topic list was created to guide and structure the focus group meetings (S1  
11  
12 124 Appendix). The two main questions were: 1. "Which factors contribute to maintaining or regaining  
13  
14 125 vitality and resilience, during the second COVID-19 wave?" 2. "Based on the factors just mentioned,  
15  
16 126 what would be interventions, or policies, that are appropriate to your needs (in terms of maintaining  
17  
18 127 resilience and vitality)?" For each of the main questions, the answers were elaborated upon to gain  
19  
20 128 understanding of why / what caused that the factors or interventions mentioned were so important  
21  
22 129 for maintain vitality and resilience. Prior to each meeting, participants provided written informed  
23  
24  
25 130 consent and filled out a short questionnaire on demographic variables.

### 28 131 **Data analysis**

29  
30 132 Focus groups data were analysed by means of thematic content analysis[32]. This method allows for  
31  
32 133 a detailed and rich description and organisation of the data and investigation of patterns of response  
33  
34 134 or meaning within the dataset. The interview data were audiotaped and transcribed verbatim. Two  
35  
36 135 researchers (MV and LK) read the transcripts in detail. Based on these transcripts, each of them  
37  
38 136 developed a structured analysis framework that consists of preliminary codes and themes. They  
39  
40 137 made use of mind maps (MV) and tables (LK) to organise the data. After that, they compared their  
41  
42 138 frameworks to reach consensus. Next, one researcher (MV) coded the transcripts line by line  
43  
44 139 according to this framework in the software programme NVivo V.12. Memos for comments were  
45  
46 140 used during coding. In case the code 'other' was used, these codes were discussed and renamed into  
47  
48 141 a new or existing code name best reflecting the contents of the otherwise uncategorised text  
49  
50  
51 142 fragment. During and after coding, the two researchers reviewed and checked the themes for  
52  
53 143 internal homogeneity and external heterogeneity. Finally, the two researchers examined each theme  
54  
55 144 for its contribution to (build or maintain) vitality and resilience and analysed the cohesion and inter-  
56  
57 145 relations between themes to come to a coherent account and accompanying narrative of the data.  
58  
59  
60

## Survey

### Participants

All workers of the Erasmus University Medical Center were invited to participate in the survey via calls on the Intranet and via the organizational weekly livestreams that provided an update on the latest COVID-19 developments and its consequences for daily work in the hospital. Participation was voluntary and all participants provided written informed consent at start of the survey.

### Measures

Needs are measured with a self-designed scale with four items. Examples of questions are: 'In which area would you like to be supported?', 'What would this support look like?' and 'What should be offered or developed?'. On predefined lists, respondents could rank 10 individual-related and 14 organisational-related answer options. Individual-related answer options included for example time management, and organisational-related answer options included for example protective measures.

### Data-analysis

Survey data were collected anonymously using Limesurvey (Version 2.06 Its Build 160524) and exported to a secure SPSS database (©IBM SPSS Statistics for Windows, Version 25.0. Armonk, NY: IBM Corp) for descriptive analysis.

## Results

### Focus groups

#### Demographics

Seven focus groups were held with intensivists, infection prevention experts, assistant infection prevention experts, nurses of COVID-19 wards, physicians COVID-19 departments (pulmonologists and internist / infectiologists) and workers from the facility services. Each group consisted of four to

1  
2  
3 170 eight participants. Due to the limited number of medical microbiologists, the focus group has been  
4  
5 171 replaced by two individual interviews. Because of the high workload and time constraints, the  
6  
7 172 scheduled focus group interview with ICU nurses were also replaced by individual interviews. A total  
8  
9  
10 173 of 38 professionals participated in the focus groups and interviews (see table 1).  
11  
12 174  
13

14 175 **Table 1.** Demographic data participant focus groups (N=38).  
15

|                                       | <i>N</i> |
|---------------------------------------|----------|
| Gender                                |          |
| Male                                  | 11       |
| Female                                | 27       |
| Age (in years)                        |          |
| <25                                   | 1        |
| 26-35                                 | 10       |
| 36-45                                 | 11       |
| 46-55                                 | 6        |
| 56>                                   | 10       |
| Function                              |          |
| Physician                             | 13       |
| Nurse                                 | 7        |
| Expert infection prevention assistant | 8        |
| Infection prevention                  | 4        |
| Facility service worker               | 6        |

16  
17  
18  
19  
20  
21  
22  
23  
24  
25  
26  
27  
28  
29  
30  
31  
32  
33  
34  
35  
36  
37  
38  
39  
40  
41  
42  
43  
44  
45  
46  
47  
48  
49 176  
50  
51  
52 177 **Conceptual model**  
53  
54

55 178 Data-analysis of the focus groups and individual interviews resulted in a model on the factors that  
56  
57 179 contribute to maintaining resilience and vitality (figure 1). The model has two axes: one ranging from  
58  
59 180 a healthy basis to adequate professional functioning and the other from individual to organization,  
60

1  
2  
3 181 resulting in four quadrants: recharge and recover (healthy basis, individual), safety and  
4  
5 182 connectedness at work (healthy basis, organizational), collaboration (professional functioning,  
6  
7 183 organizational) and professional identity (professional functioning, individual). Each quadrant  
8  
9  
10 184 contains several themes, which are discussed in more detail in the paragraph below.  
11  
12

## 13 185

### 16 186 **Factors contributing to vitality and resilience**

#### 17 18 187 **Healthy basis, individual factors (quadrant: recharge & recover)**

19  
20 188 **Time-off.** This theme refers to time-off from work, but also to the expressed wish to take a break  
21  
22  
23 189 from COVID-19 in general. Time-off could be spent in various ways, named were sports, hobbies,  
24  
25 190 time with family and time to rest. In some instances, increased time needed for recovery was  
26  
27 191 reported:

28  
29 192 *“after three weeks of holiday, I thought: I can take it completely 200%! But the curve spiralled down*  
30  
31  
32 193 *much faster than the first time, also because there are just too many other things at play that need*  
33  
34 194 *attention.... people who are ill or take care of others, but colleagues as well. Of whom you think, yes,*  
35  
36 195 *you know, when are they going to collapse?”*  
37

38 196 **Stability at home.** A stable home situation was considered of extra importance during the hectic of  
39  
40  
41 197 the pandemic. It was important as a source of joy and support, but sometimes as an extra stressor  
42  
43 198 when it comes to combining a hectic work situation with children at home school and informal care  
44  
45 199 tasks.

46  
47 200 *“...in the end you want your child to be doing all right. And that just gives you peace of mind. And I*  
48  
49  
50 201 *can work just fine if I know that my daughter is taken care off.”*  
51

#### 52 202 **Healthy basis, organizational factors (quadrant: safety & connectedness at work)**

53 203 **Safety.** This theme covers several areas and included good and sufficient protective personal  
54  
55  
56  
57 204 equipment, supervision of compliance with the COVID-19 rules by hospital staff and by visitors, safety  
58  
59 205 and trust within the team, stability of the work environment and the protection of older/vulnerable  
60

1  
2  
3  
4  
5  
6  
7  
8  
9  
10  
11  
12  
13  
14  
15  
16  
17  
18  
19  
20  
21  
22  
23  
24  
25  
26  
27  
28  
29  
30  
31  
32  
33  
34  
35  
36  
37  
38  
39  
40  
41  
42  
43  
44  
45  
46  
47  
48  
49  
50  
51  
52  
53  
54  
55  
56  
57  
58  
59  
60

206 staff:

207 *"I also have some risk factors: a bit overweight, type 2 diabetes, I had surgery on my heart. Basically,*  
208 *if I get COVID, I belong to a category I do not want to belong to. So that is already a pressure on me*  
209 *personally, that I belong to a high-risk population".*

210 **Clarity.** Clarity was needed first and for all with regard to knowing which care will and will not  
211 continue, and per when. Furthermore, respondents marked clarity with regard to the division of tasks  
212 within the team, and regarding the COVID-19- rules on the work floor as important.

213 *"I would like to see more clarity indeed. That you do the tasks that you are actually there for, so to*  
214 *say"*

215 **Supportive team spirit.** This theme refers to connection with team members, for instance via  
216 humour:

217 *Speaker1: "Well, humor may also help to keep things going, or put things into perspective".*

218 *Speaker2: "Yes, it does apply to acute care. Sometimes almost morbid humour, but that is what you*  
219 *need to process things."*

220 **Adherence to working hours.** Topics within this theme were: taking breaks, setting limits to overtime  
221 and the possibility to take days off/vacation. These help to prevent getting over-involved in work and  
222 to keep sufficient personal distance to work.

223 **Professional functioning, individual factors (quadrant: collaboration)**

224 **Solidarity.** This theme refers to solidarity within the team, between departments within the hospital  
225 and between regions in the Netherlands.

226 *"I think the best thing we can learn from the first wave and what we should try to take into the*  
227 *second wave is solidarity. It's gone now. And I think that says it all."*

228 **Appreciation and respect.** This theme was defined in terms of personal attention, showing  
229 appreciation, being trusted, realism, respect, sincere and adequate responding to answers when  
230 asked "what do you need?", and bonus/salary.

231 *Speaker1: "That made me really happy, that you think: oh, nice cup of soup. Now you just get over it."*

1  
2  
3 232 *Focus group leader: "Yes. And was that because of the appreciation that it assumed or..."*

4  
5 233 *Speaker : "Yes."*

6  
7 234 *Focus group leader: "... also just for the practicality of when else should I eat?"*

8  
9 235 *Speaker1: "Well, both! I admit that!"*

10  
11 236 *Speaker2: "Both. Yes, both."*

12  
13 237 *Speaker1: "It was busy, so it's nice if you can get a cup of soup."*

14  
15 238 *Speaker2:" [.....] but soup doesn't compensate for lack of staff, huh! That should not be the message*  
16  
17  
18  
19 239 *of we give them a cup of soup and they are satisfied. That's not how it works!"*

20  
21 240 **Practical support.** Generic topics were: food in the department (soup, fruit), grocery shopping  
22  
23 241 service, good parking opportunities, support for childcare and timely replenishment of materials at  
24  
25 242 departments. Department-specific topics were: well-equipped ICU overnight rooms, better aprons in  
26  
27 243 the ICU, work telephones with e-mail function, and good quality material for internal transport.

28  
29 244 **Realistic job demands.** This theme was the positive counterpart of a "high workload", as this quote  
30  
31  
32 245 below illustrates:

33  
34 246 *"But what seriously threatens vitality and resilience, I think, is the fact that now you are also expected*  
35  
36 247 *to keep the plates spinning. And if you think logically, you just can not. "*

37  
38  
39 248 **Sufficient amount of staff.** This was a recurrent theme throughout all layers of the organization; from  
40  
41 249 structural secretarial support to medical specialists.

42  
43  
44 250 **Professional functioning, organizational factors (quadrant: professional identity)**

45  
46 251 **Professional development.** This theme refers to the opportunity for academic development and  
47  
48 252 access to professional training and education.

49  
50 253 **Autonomy.** Autonomy in job performance, for example about the timing of breaks and working from  
51  
52 254 home was considered important to persevere harsh working circumstances. This theme also referred  
53  
54 255 to respect for the autonomy from specific occupational groups.

55  
56 256 **Work ethos.** This factor refers to delivering quality, achieving success, being able to contribute,  
57  
58 257 pleasure in work, curiosity, facing challenges, being meaningful. People find satisfaction and self-

1  
2  
3 258 esteem in the fact that they can do their work in a high-quality way. If this is not possible, for  
4  
5 259 whatever reason, this has a negative impact on resilience and vitality, as this quote shows:  
6  
7 260 *“Look, as of my profession, I have seen many patients dying and that is what it is, provided you have*  
8  
9  
10 261 *done everything you can do. But if you get the feeling that you have fallen short and that perhaps in*  
11  
12 262 *another era, that patient would have survived, that is a feeling you may have for a while, but you*  
13  
14 263 *should not have for too long...”*

15  
16 264  
17  
18  
19  
20 265 **Organizational interventions that could contribute to vitality and resilience**

21  
22 266 Analysis of the focus groups data resulted in three areas for organizational interventions to increase  
23  
24 267 vitality and resilience among professionals: communication and expectations related to COVID-19;  
25  
26 268 monitor and improve the mental resilience of workers; and appreciation. These areas are addressed  
27  
28  
29 269 the text below.

30  
31  
32 270  
33  
34  
35 271 **Communication and expectations related to COVID-19**

36  
37 272 During this second COVID-19 wave, there was a clear informational need among respondents, for  
38  
39 273 instance with regard to the downscaling of regular care and upscaling of COVID-19 care.  
40  
41 274 Furthermore, consistency in communication was felt to be important: getting different messages is  
42  
43 275 confusing and may even lead to a decreased support for organizational policy. In addition to making  
44  
45 276 decisions and communicating these, respondents felt it was important for the higher management to  
46  
47 277 have realistic expectations. It was perceived unrealistic to continue all care at the same pace during  
48  
49 278 the persisting pandemic. Long-term investment in COVID-19 care was suggested as an option to  
50  
51 279 combat ad hoc organization of this type of care. This was thought to potentially benefit the continuity  
52  
53 280 of personnel, quality and professional development opportunities.  
54  
55  
56  
57  
58 281  
59  
60

### 282 **Monitor and improve mental resilience**

283 First, we found that professionals derive support and strength from contact with their colleagues.

284 Second, although the availability of mental support teams were positively valued, few made use of

285 them. Rather, respondents indicated “not for me, but I do see people around me who need it”.

286 Triage in offering mental support is required: easy accessible and at team level when possible, but

287 with the option for rapidly scaling up to individual professional help when needed. Further, it was

288 noted that the fulfilment of basic human needs also contributes to professionals’ mental resilience,

289 such as safety and rest. Professionals who are feeling unsafe or depleted from energy do not have

290 their full capacity to perform on work related tasks that require focus, decision making capacities and

291 emotional stability.

292

### 293 **Appreciation: sincerity and practical support**

294 Feeling appreciated and supported by management and/or co-workers was described as important

295 for maintaining vitality. When it comes to expressing appreciation, it was felt important that this was

296 done in a sincere and person-directed manner. Respondents were adverse to compliments just for

297 the sake of compliments, and in those situations compliments sorted adverse effect. Further, it was

298 mentioned that when managers informed on what they could do to help, they should also be reliable

299 in the follow-up to the responses given. In this sense practical support, be it upon specific requests or

300 in general was also experienced as an expression of appreciation. Furthermore, results showed that

301 the need for appreciation existed through all organizational layers, so not only along top-down lines

302 but also vice versa and horizontally.

303

### 304 **Results of the needs assessment survey**

305 Four hundred seventy-nine respondents filled out the needs assessment. Table 2 shows respondent

306 characteristics. Results are presented with reference to the working environment of the respondents,



namely working at COVID-19 department, working at non-COVID department and homeworkers.

Figure 2 shows the responses to individual-related answer options. Both hospital and homeworkers indicated that a healthy lifestyle, work-life balance and working from home were the most important areas wherein they would appreciate individual support. Figure 3 shows the results for organisation-related answer options. Professionals at COVID-19 departments indicated appreciation at work, work pressure and working hours as the three most important areas for organisational support. Professionals working at non-COVID-19 departments rated respectively appreciation at work, a proper workplace at home and work pressure as most important. Homeworkers appreciated a proper workplace at home as the most important area where the organisation could provide support, followed by team performance and bonding and attention for work-life balance.

**Table 2.** Demographic data participants needs assessment (N=479).

|                | N (%)       |
|----------------|-------------|
| Gender*        |             |
| Male           | 80 (16,7%)  |
| Female         | 398 (83,3%) |
| Age (in years) |             |
| <25            | 22 (4,6%)   |
| 26-35          | 131 (27,3%) |
| 36-45          | 108 (22,5%) |
| 46-55          | 103 (21,5%) |
| 56>            | 115 (24,0%) |

\* 1 missing gender.

## Discussion

Qualitative data-analysis resulted in a conceptual model of the factors that contribute to maintaining resilience and vitality in healthcare professionals during the COVID-19 pandemic. This model was derived by inductive analysis of our focus groups data. However, reflecting upon our model, we see high resemblance with clinical psychology models on personality development, especially with Schema Focused Psychotherapy (SFT)[33]. According to SFT, all humans have basic needs that should be fulfilled, at least to a sufficient extent, during the course of life. These basic needs are: 1. Attachment and security, 2. Autonomy, competence and identity, 3. Freedom to express important needs and feelings 4. Spontaneity and play. 5. Realistic boundaries and self-control. These domains match the factors that we found in our model, such as safety, acceptance, bonding, clarity, autonomy and humour (play). These similarities might make us aware how important the fulfilment of psychological basic needs in fact are. Having said this, we realize that psychological needs in itself are also part of a larger whole. Theories as old as Maslow's, place psychological needs at the higher layers of the pyramid of human needs. In his theory, physical needs come first[34]. This principle still holds true, as is shown in a more modern variant described in the British Psychological Society guidelines for leaders and managers of healthcare services during COVID-19[35] and as was demonstrated in a study from China, where health care professionals first and foremost longed for rest and good sleep instead of psychological help[36].

Results from both the focus group interviews and the survey showed that both practical and team support ranked high in the support needs of healthcare professionals during COVID-19. With regard to support from the managers, it was emphasised that this support should be sincere and that both listening to and acting upon expressed needs were important. These findings are in line with findings from other recent studies[37-40]. Of particular interest here is the study by Bennett et al. (2020), where data of healthcare workers experience was collected through an anonymous website[40].

1  
2  
3  
4  
5  
6  
7  
8  
9  
10  
11  
12  
13  
14  
15  
16  
17  
18  
19  
20  
21  
22  
23  
24  
25  
26  
27  
28  
29  
30  
31  
32  
33  
34  
35  
36  
37  
38  
39  
40  
41  
42  
43  
44  
45  
46  
47  
48  
49  
50  
51  
52  
53  
54  
55  
56  
57  
58  
59  
60

Results of this study showed that lack of support by the senior management severely impacted upon professionals' well-being and motivation. Next to support by managers, team support and bonding turned out to be important. For this purpose, people usually reverted to natural, pre-existing bonds of trust. The power of positive team spirit and bonding should not be under-estimated: it is known from literature on major disasters that the connection between members from the same group (i.e., the community), harbors strong protective and healing potential[25, 37, 41]. Further, a study by Muller et al. also performed during the COVID-19 pandemic, found that health care workers reported low interest in professional help and greater reliance on social support and contact; and that social support correlated with less mental health problems[42]. These findings underline the need for interventions aiming at facilitating support at the workplace, especially as these may help to identify those workers who are in need for more intensive treatment[43]. Furthermore, special attention is needed for the social support needs of homeworkers, as they are cut-loose from their natural support environment. Our results indeed showed that for homeworkers, team bonding ranked highly in the needs assessment.

Another finding worth highlighting are the high levels of job dedication and high professional standard professionals' wish to adhere to. Normally, health care workers may experience some type of inner rewarding, self-esteem or pride from the quality of care they deliver. Being unable to live up to these standards - in this case because of pandemic-related factors- may lead to moral injury, which is characterized by negative thoughts about themselves or others as well as intense feelings of shame, guilt, or disgust[37, 40]. In those cases, social, moral and mental support from others become even more important, because health care professionals fail to experience their usual inner feelings of reward and fulfilment.

Strengths of this study include its mixed-methods character, whereby the results from the survey were found to support the focus group study results. A second strength lies in the succeeding of that

1  
2  
3 382 many live focus group interviews in a short time span, wherein busy participants were both allowed  
4  
5 383 and took the time to participate in his study. The fact that one of the senior investigators (MM)  
6  
7 384 involved in the focus group interviews is experienced as ICU nurse is both a strength and a limitation.  
8  
9  
10 385 The strength lies in increased sensitivity to issues at stake at an ICU-ward. A limitation however may  
11  
12 386 be potential difficulty to take an outsider position. This was accounted for by the fact that the focus  
13  
14 387 group interview leader was LK, who has no ICU experience. In addition, interviews with ICU nurses  
15  
16 388 where held by LK solely. Furthermore, data-analyses were performed by other members of the  
17  
18  
19 389 research team, namely MR and LK. Another limitation of this study is the selection of focus groups,  
20  
21 390 which included frontline health care workers only. Overall outcomes would be more generalizable if  
22  
23 391 we also had included groups of homeworkers and professionals from non-COVID departments.  
24  
25 392 Furthermore, these results are obtained at a large academic hospital in Western Europe, and results  
26  
27  
28 393 therefore cannot be generalized, as perceptions and values of professionals may differ according to  
29  
30 394 culture and context.

## 36 396 **Conclusion**

37  
38  
39  
40 397 This study gives insight in the specific support needs of healthcare workers during the COVID-19  
41  
42 398 pandemic. Both qualitative and quantitative data analyses pointed towards the importance of  
43  
44 399 appreciation and respect, solidarity, and realistic workload expectations. Consequently,  
45  
46 400 organizational interventions to monitor and promote vitality and resilience among healthcare  
47  
48 401 professionals during the COVID-19 pandemic should focus on these particular topics.  
49  
50  
51

## 56 403 **Funding**

57  
58 404 This work was internally supported by the board of Erasmus MC (no grant number applicable), which  
59  
60

1  
2  
3 405 had no role in the design of this study and has no role in its execution, analysis and interpretation of  
4  
5 406 data.

7  
8 407 **Competing interest**

9  
10 408 The authors declare no conflicts of interest.

11  
12  
13 409 **Author contributions**

14  
15  
16 410 LK: study design qualitative part study, data collection, data analysis, writing of the paper

17  
18 411 MV: creating questionnaire in Limesurvey, data collection, data analysis, writing of the paper

19  
20 412 KOH: study design quantitative study, development of questionnaire, review of the paper

21  
22 413 TKP: study design, protocol quantitative part of study, review of the paper

23  
24 414 AP: initiation of the study and input questionnaire, review of the paper.

25  
26 415 WH: study design, review of the paper and final approval

27  
28 416 JB: study design, analysis, review of the paper and final approval

29  
30 417 MM: study design and protocol, data collection, review of the paper and final approval

31  
32 418 **Acknowledgements:** The authors would like to thank all the participating respondents for their  
33  
34  
35 419 involvement in the study.

36  
37  
38  
39  
40 420 **Availability of data and materials:** Anonymized data gathered and analysed during the current study  
41  
42 421 are not publicly available due to legal and ethical restriction. These can be requested from the  
43  
44 422 corresponding author as well as text and photo material of the developed intervention. Materials  
45  
46 423 described in the manuscript, including all relevant raw data, will be freely available at a reasonable  
47  
48 424 request to any scientist wishing to use them for non-commercial purposes.

49  
50  
51  
52 425 **Word count:** 3865

53  
54  
55 426

## References

1. Azoulay E, De Waele J, Ferrer R, et al. Symptoms of burnout in intensive care unit specialists facing the COVID-19 outbreak. *Annals of intensive care* 2020;10(1):1-8.
2. Kok N, Hoedemaekers A, van der Hoeven H, et al. Recognizing and supporting morally injured ICU professionals during the COVID-19 pandemic. *Intensive Care Medicine* 2020.
3. Pappa S, Ntella V, Giannakas T, et al. Prevalence of depression, anxiety, and insomnia among healthcare workers during the COVID-19 pandemic: A systematic review and meta-analysis. *Brain, behavior, and immunity* 2020.
4. Lai J, Ma S, Wang Y, et al. Factors associated with mental health outcomes among health care workers exposed to coronavirus disease 2019. *JAMA network open* 2020;3(3):e203976-e76.
5. Solms L, van Vianen AEM, Theeboom T, et al. Keep the fire burning: a survey study on the role of personal resources for work engagement and burnout in medical residents and specialists in the Netherlands. *BMJ open* 2019;9(11).
6. Prins JT, Hoekstra-Weebers J, Van De Wiel HBM, et al. Burnout among Dutch medical residents. *International journal of behavioral medicine* 2007;14(3):119-25.
7. Trappenburg J, Bleijenberg N, Cate D, et al. Co-Fit: Behoud van korte en lange termijn fysieke/mentale gezondheid en inzetbaarheid van zorgprofessionals blootgesteld aan Covid-19 crisis werkomstandigheden.: UMCU/HU/THINC, 2020.
8. Gold JA. Covid-19: adverse mental health outcomes for healthcare workers: British Medical Journal Publishing Group, 2020.
9. Maunder R, Hunter J, Vincent L, et al. The immediate psychological and occupational impact of the 2003 SARS outbreak in a teaching hospital. *Cmaj* 2003;168(10):1245-51.
10. Ulrich CM. Ebola is causing moral distress among African healthcare workers. *Bmj* 2014;349:g6672.

1  
2  
3  
4  
5  
6  
7  
8  
9  
10  
11  
12  
13  
14  
15  
16  
17  
18  
19  
20  
21  
22  
23  
24  
25  
26  
27  
28  
29  
30  
31  
32  
33  
34  
35  
36  
37  
38  
39  
40  
41  
42  
43  
44  
45  
46  
47  
48  
49  
50  
51  
52  
53  
54  
55  
56  
57  
58  
59  
60

11. Wu P, Fang Y, Guan Z, et al. The psychological impact of the SARS epidemic on hospital employees in China: exposure, risk perception, and altruistic acceptance of risk. *The Canadian Journal of Psychiatry* 2009;54(5):302-11.
12. Bukhari EE, Temsah MH, Aleyadhy AA, et al. Middle East respiratory syndrome coronavirus (MERS-CoV) outbreak perceptions of risk and stress evaluation in nurses. *The Journal of Infection in Developing Countries* 2016;10(08):845-50.
13. Zhu Z, Xu S, Wang H, et al. COVID-19 in Wuhan: Immediate Psychological Impact on 5062 Health Workers. *MedRxiv* 2020.
14. Xiao H, Zhang Y, Kong D, et al. The effects of social support on sleep quality of medical staff treating patients with coronavirus disease 2019 (COVID-19) in January and February 2020 in China. *Medical science monitor: international medical journal of experimental and clinical research* 2020;26:e923549-1.
15. Zhang Y, Wang C, Pan W, et al. Stress, burnout, and coping strategies of frontline nurses during the COVID-19 epidemic in Wuhan and Shanghai, China. *Frontiers in psychiatry* 2020;11:1154.
16. Bagnasco A, Zanini M, Hayter M, et al. COVID 19—A message from Italy to the global nursing community. *Journal of Advanced Nursing* 2020.
17. Murthy S, Gomersall CD, Fowler RA. Care for critically ill patients with COVID-19. *Jama* 2020;323(15):1499-500.
18. Strong SM, Magama Z, Mallick R, et al. Waiting for myomectomy during the COVID-19 pandemic: The vicious cycle of psychological and physical trauma associated with increased wait times. *International Journal of Gynecology & Obstetrics* 2020;151(2):303-05.
19. Beisani M, Vilallonga R, Petrola C, et al. Effects of COVID-19 lockdown on a bariatric surgery waiting list cohort and its influence in surgical risk perception. *Langenbeck's archives of surgery* 2020:1-8.
20. Goyal N, Venkataram T, Singh V, et al. Collateral damage caused by COVID-19: Change in volume and spectrum of neurosurgery patients. *Journal of Clinical Neuroscience* 2020;80:156-61.

- 1  
2  
3 477 21. Joly H. Lead your team into a post-pandemic world. 2020.  
4  
5 478 22. De Villers MJ, DeVon HA. Moral distress and avoidance behavior in nurses working in critical care  
6  
7 and noncritical care units. *Nursing Ethics* 2013;20(5):589-603.  
8 479  
9  
10 480 23. Moss M, Good VS, Gozal D, et al. An official critical care societies collaborative statement:  
11  
12 481 burnout syndrome in critical care health care professionals: a call for action. *American*  
13  
14 482 *Journal of Critical Care* 2016;25(4):368-76.  
15  
16 483 24. Van Mol MMC, Kompanje EJO, Benoit DD, et al. The prevalence of compassion fatigue and  
17  
18 burnout among healthcare professionals in intensive care units: a systematic review. *PLoS one*  
19 484  
20 2015;10(8):e0136955.  
21 485  
22  
23 486 25. Troglia da Silva FC, Neto MLR. Psychiatric disorders in health professionals during the COVID-19  
24  
25 pandemic: A systematic review with meta-analysis. *J Psychiatr Res* 2021:474-87.  
26 487  
27  
28 488 26. van Mol MMC, Nijkamp MD, Bakker J, et al. Counterbalancing work-related stress? Work  
29  
30 489 engagement among intensive care professionals. *Australian Critical Care* 2018;31(4):234-41.  
31  
32 490 27. Schaufeli WB, Salanova M, González-Romá V, et al. The measurement of engagement and  
33  
34 491 burnout: A two sample confirmatory factor analytic approach. *Journal of Happiness studies*  
35  
36 492 2002;3(1):71-92.  
37  
38  
39 493 28. Schaufeli WB. Engaging leadership in the job demands-resources model. *Career Development*  
40  
41 494 *International* 2015.  
42  
43 495 29. Bakker AB, Demerouti E, Sanz-Vergel AI. Burnout and work engagement: The JD-R approach.  
44  
45 496 2014.  
46  
47  
48 497 30. Yu F, Raphael D, Mackay L, et al. Personal and work-related factors associated with nurse  
49  
50 498 resilience: a systematic review. *International journal of nursing studies* 2019;93:129-40.  
51  
52 499 31. van Mol M, de Veer M, de Pagter A, et al. Vitality, resilience and the need for support among  
53  
54 500 hospital employees during the COVID-19 pandemic: study protocol of a mixed-methods  
55  
56 501 study. *BMJ open* 2021;11(10):e049090.  
57  
58  
59  
60



1  
2  
3  
4  
5  
6  
7  
8  
9  
10  
11  
12  
13  
14  
15  
16  
17  
18  
19  
20  
21  
22  
23  
24  
25  
26  
27  
28  
29  
30  
31  
32  
33  
34  
35  
36  
37  
38  
39  
40  
41  
42  
43  
44  
45  
46  
47  
48  
49  
50  
51  
52  
53  
54  
55  
56  
57  
58  
59  
60

32. Braun V, Clarke V. Using thematic analysis in psychology. *Qualitative research in psychology* 2006;3(2):77-101.
33. Young J, Klosko J, Weishaar M. Schemagerichte therapie: handboek voor therapeuten.[Scheme based therapy: Manual for therapists]. *Houten, the Netherlands: Bohn Stafleu van Loghum* 2004.
34. Maslow AH. A theory of human motivation. *Psychological review* 1943;50(4):370.
35. The psychological needs of healthcare staff as a result of the Coronavirus pandemic. *Br Psychol Soc*; 2020.
36. Chen Q, Liang M, Li Y, et al. Mental health care for medical staff in China during the COVID-19 outbreak. *The Lancet Psychiatry* 2020;7(4):e15-e16.
37. Greenberg N, Docherty M, Gnanapragasam S, et al. Managing mental health challenges faced by healthcare workers during covid-19 pandemic. *bmj* 2020;368.
38. Walton M, Murray E, Christian MD. Mental health care for medical staff and affiliated healthcare workers during the COVID-19 pandemic. *European Heart Journal: Acute Cardiovascular Care* 2020;9(3):241-47.
39. Feroz AS, Ali NA, Feroz R, et al. Exploring community perceptions, attitudes and practices regarding the COVID-19 pandemic in Karachi, Pakistan. *BMJ open* 2021;11(8):e048359.
40. Bennett P, Noble S, Johnston S, et al. COVID-19 confessions: a qualitative exploration of healthcare workers experiences of working with COVID-19. *BMJ open* 2020;10(12):e043949.
41. Wind TR, Komproe IH. The mechanisms that associate community social capital with post-disaster mental health: a multilevel model. *Social science & medicine* 2012;75(9):1715-20.
42. Muller AE, Hafstad EV, Himmels JPW, et al. The mental health impact of the covid-19 pandemic on healthcare workers, and interventions to help them: A rapid systematic review. *Psychiatry research* 2020:113441.
43. Tannenbaum SI, Traylor AM, Thomas EJ, et al. Managing teamwork in the face of pandemic: evidence-based tips. *BMJ Quality & Safety* 2021;30(1):59-63.

## Figure legends

**Figure 1.** Conceptual model of factors contributing to vitality and resilience

**Figure 2.** Individual-related support needs

**Figure 3.** Organisational-related support needs

## Supporting information

**S1 Appendix.** Topic list focus groups

**S2 Appendix.** Protocol paper

1  
2  
3  
4  
5  
6  
7  
8  
9  
10  
11  
12  
13  
14  
15  
16  
17  
18  
19  
20  
21  
22  
23  
24  
25  
26  
27  
28  
29  
30  
31  
32  
33  
34  
35  
36  
37  
38  
39  
40  
41  
42  
43  
44  
45  
46  
47  
48  
49  
50  
51  
52  
53  
54  
55  
56  
57  
58  
59  
60

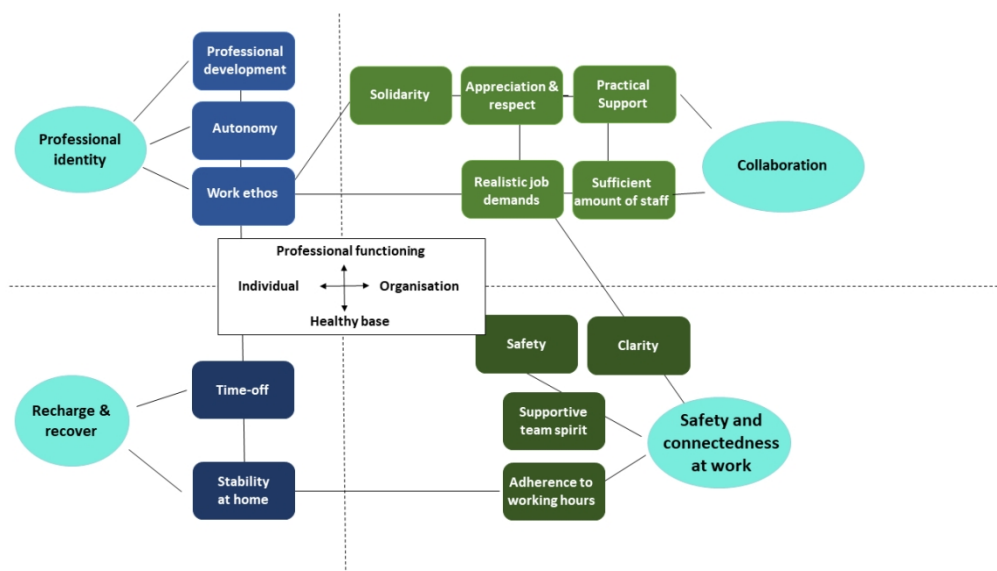

Figure 1. Conceptual model of factors contributing to vitality and resilience

338x190mm (96 x 96 DPI)

**Figure 2.** Individual-related support needs

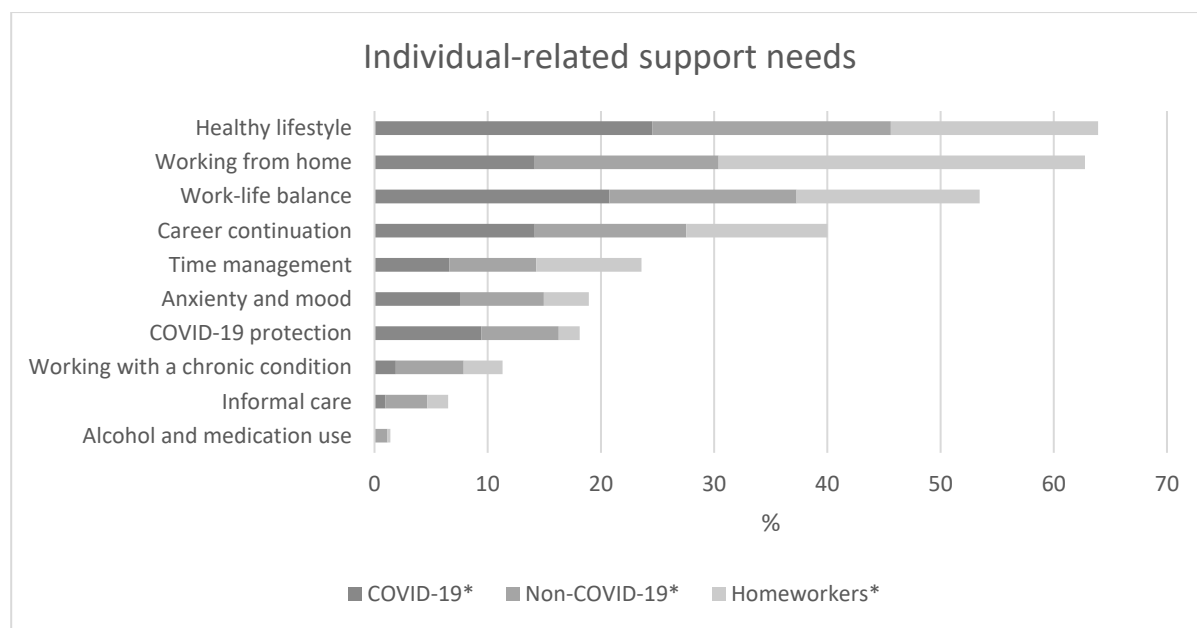

\* *COVID-19*: professionals working in COVID-19 departments who in addition could also be working in non-COVID-19 departments and/or from home

*Non-COVID-19*: professionals working in non-COVID-19 departments who in addition could also be working from home

*Homeworkers*: people who only work from home

1  
2  
3  
4  
5  
6  
7  
8  
9  
10  
11  
12  
13  
14  
15  
16  
17  
18  
19  
20  
21  
22  
23  
24  
25  
26  
27  
28  
29  
30  
31  
32  
33  
34  
35  
36  
37  
38  
39  
40  
41  
42  
43  
44  
45  
46

**Figure 3.** Organisation-related support needs

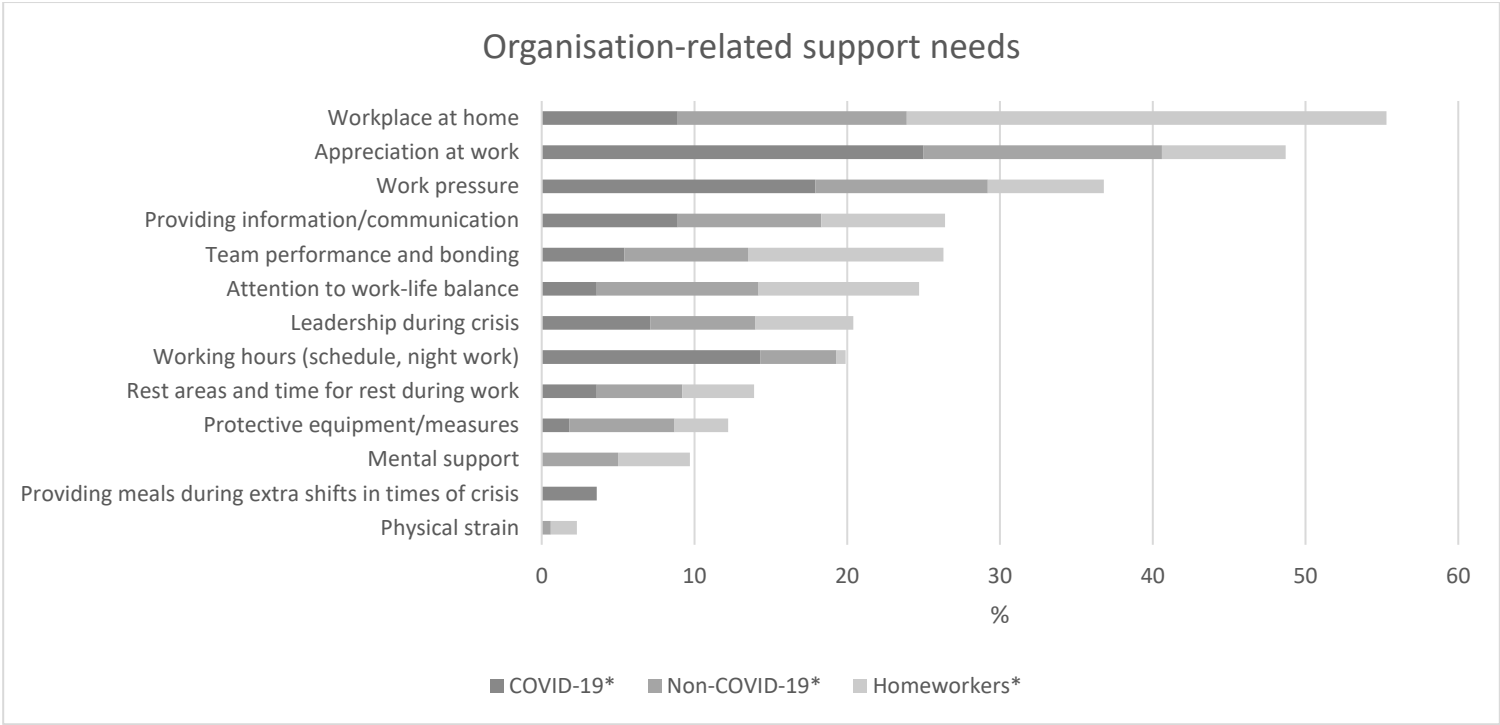

\* *COVID-19*: professionals working in COVID-19 departments who in addition could also be working in non-COVID-19 departments and/or from home  
*Non-COVID-19*: professionals working in non-COVID-19 departments who in addition could also be working from home  
*Homeworkers*: people who only work from home

## S1 Appendix I. Topic list focus groups

### Opening and introduction

Welcome.

Introduction and explanation of the purpose of the meeting and focus group rules.

Informed consent.

### Introductory question

What usually works for you to maintain your resilience and vitality at work? Is this different now, in the COVID-19 time period? What makes it different now? And in what sense is it different?

### Transition question

The research question contains an assumption “maintaining”. That implies that it is still there. If you look at yourself, how do you see it, is it about maintaining resilience and vitality, or is it actually about rebuilding resilience and vitality after the first COVID-19 wave?

### Key questions

Key questions cover 2 categories: 1. Factors of influence and 2. Interventions aimed at those factors

#### *1.1 Open*

Which factors contribute to maintaining your resilience and vitality at work, during the second COVID-19 wave?

Brainstorm and inventory of factors on whiteboard.

Cluster if applicable. These are various factors, you can roughly divide them into (for example, depending on outcomes): appreciation (whose? how? ), resources (staff and products), own balance (work, home, relaxation), own feeling about the situation: acceptance (vs pressure and tension), professional ethos / finding meaning etc.

#### *1.2 Further exploring*

What makes these factors contribute to your resilience and vitality? How does that work?

Then specifically, for each factor mentioned: how does it work, what makes that..... contribute to the maintenance of resilience and vitality? What are the underlying reasons (motives) for this?

#### *2.1 Open*

Using this list (factors of influence), what would be interventions, or policies, that are appropriate to your needs (in terms of maintaining resilience and vitality)?

Make an inventory of interventions on whiteboard.

## 2.2 Further exploring

How does it work that, what makes that..... would be a suitable intervention when it comes to maintaining resilience and vitality? How does that work? Would you be motivated to participate in such an intervention? What is/are your reasons/motives for this? How is that?

Note: in case the proposed interventions focus on one and the same factor, mention this and refer to the other factors mentioned earlier as well.

### Concluding questions and closing remarks

We are going to wrap up. Of all the issues discussed today, which one is the most important to you?  
Or: if you were to give your policy advice (on this subject) to the Board of Directors in a few sentences, what would you say?

Thank you for your contributions.

# BMJ Open Vitality, resilience and the need for support among hospital employees during the COVID-19 pandemic: study protocol of a mixed-methods study

Margo van Mol <sup>1</sup>, Mathijs de Veer,<sup>2</sup> Anne de Pagter,<sup>3</sup> T A Kouwenhoven-Pasmooij,<sup>4</sup> Witte J G Hoogendijk,<sup>5</sup> Jan J van Busschbach,<sup>2</sup> Karen Oude Hengel,<sup>6</sup> Leonieke Kranenburg<sup>2</sup>

**To cite:** van Mol M, de Veer M, de Pagter A, *et al*. Vitality, resilience and the need for support among hospital employees during the COVID-19 pandemic: study protocol of a mixed-methods study. *BMJ Open* 2021;11:e049090. doi:10.1136/bmjopen-2021-049090

► Prepublication history for this paper is available online. To view these files, please visit the journal online (<http://dx.doi.org/10.1136/bmjopen-2021-049090>).

Received 16 January 2021  
Accepted 27 September 2021

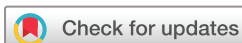

© Author(s) (or their employer(s)) 2021. Re-use permitted under CC BY-NC. No commercial re-use. See rights and permissions. Published by BMJ.

For numbered affiliations see end of article.

## Correspondence to

Dr Margo van Mol;  
[m.vanmol@erasmusmc.nl](mailto:m.vanmol@erasmusmc.nl)

## ABSTRACT

**Introduction** The COVID-19 pandemic has had a significant impact on the physical and mental functioning of healthcare professionals, especially those working on the ‘frontline’, and other hospital workers. At the onset of the crisis, various interventions were introduced to promote resilience and offer mental support to these professionals. However, it is unknown whether the interventions will meet the needs of professionals as the COVID-19 pandemic continues.

The goal of this exploratory study is to gain insight in factors that protect the vitality and resilience of Dutch hospital employees during the so-called ‘second wave’ of the COVID-19 pandemic. This paper describes the study protocol.

**Methods and analysis** This exploratory study applies a mixed-methods design, using both quantitative and qualitative methods of data collection and analysis. The first part of the study (substudy I) consists of surveys among doctors and nurses in COVID-19 departments and non-COVID-19 departments, and other professionals in the hospital (ie, managers and homeworkers) in 2020 and 2021. The second part of the study (substudy II) consists of focus groups and interviews among professionals of the intensive care unit, COVID-19 departments and infection prevention units.

**Ethics and dissemination** The research protocol for this study has been approved by the Medical Ethics Committee (MEC-2020-0705). The outcomes of this study will be used to develop and implement interventions to support hospital employees maintaining their vitality and resilience during and after the COVID-19 pandemic. Employees with vitality experience less work-related stress and make a positive contribution to healthcare quality.

## INTRODUCTION

Worldwide, it has been reported that the COVID-19 pandemic had a significant impact on the physical and mental functioning of healthcare professionals, especially for those working on the ‘frontline’ (eg, intensive care units (ICUs), COVID-19 departments and infection prevention units).<sup>1–4</sup> Indeed, also

## Strengths and limitations of this study

- A mixed-methods design will be applied which strengthens the insights on vitality, resilience and the need for support among hospital employees.
- Insight in vitality, resilience and need for support of frontline workers from different departments will be investigated, as well as managers and homeworkers who will be compared in contrast to the majority of studies so far, which focused mainly on the needs of healthcare professionals such as nurses and doctors.
- Real-life data gathering started during the beginning of second COVID-19 wave, ongoing to autumn 2021.
- The COVID-19 pandemic is the motivation for this study, but may also limit the response rates or generalisability of this study, given its unpredictable course.

in the Netherlands, the COVID-19 pandemic had an impact on healthcare workers. This is critical, as it has been reported that some Dutch medical professionals were already overburdened before the pandemic.<sup>5 6</sup>

The need for high-intensity medical treatment of patients rapidly increased during the COVID-19 pandemic, during which the work circumstances became uncertain and stressful.<sup>7</sup> These work circumstances included the continuous use of personal protective equipment, adapted responsibilities and tasks, moral dilemmas and the risk of contamination for the healthcare professionals themselves.<sup>8</sup> Interpersonal contact with patients’ family members, one of the core features of the professional practice of nurses, was considerably reduced due to visiting limitations in most hospitals.<sup>9 10</sup> In addition, the work environment also changed for ICU nurses as their teams changed due to the practical help from (former) colleagues



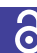

and other healthcare professionals. This sudden shift in activities and responsibilities required ICU nurses to have additional competences maintaining high-quality healthcare. Buddies, or support staff from other departments in the hospital, were sometimes confronted with distressing or even shocking events during the first hectic weeks of the pandemic. Professionals of the infection prevention unit had to deal with an enormous workload due to the accumulation of new tasks and changing work processes, as well as the social turbulence resulting from the implemented quarantine measures. In the case of a health crisis such as the COVID-19 pandemic, the health and vitality of the frontline professionals became even more critical. Because a higher workload and stress could have a higher appeal on the physical and mental resources of the professionals. However, the COVID-19 pandemic not only had impact on the clinicians of the hospital, but the work environment also changed for non-clinical professionals who suddenly had to work and communicate from home. In addition to this, homeworkers might lack a sense of purpose, solidarity and valuable contribution to the crisis situation.<sup>11</sup> Last, the COVID-19 pandemic required great effort from managers.<sup>12</sup> More than ever, they had to deal with logistic and administrative processes in the upscaling of high-intensity care, improving work alliances and the integration of staff in newly formed teams, and in managing the continuous flow of changing information.

### Health, vitality and resilience

In previous virus outbreaks, such as the outbreaks of Severe Acute Respiratory Syndrome (SARS), Ebola and Middle East Respiratory syndrome (MERS), it became clear that increased stress levels at work in healthcare professionals were associated with fear of contamination; shortages of materials; poor communication between healthcare professionals; unclear work instructions and information; deficient or non-functioning equipment; and inadequate planning among healthcare professionals.<sup>13–16</sup> Experiences from China during the COVID-19 pandemic showed similar results.<sup>17–19</sup> In a European study on work-related stress reactions among ICU healthcare professionals, half (50.4%) of the respondents showed symptoms of anxiety after the first wave of COVID-19.<sup>1</sup> Early phase evidence on COVID-19 suggested that healthcare professionals experienced mood and sleep disturbances during the outbreaks, stressing the need to establish ways to minimise mental health risks and support interventions aiming at pandemic conditions.<sup>3</sup> In the short-term, this work-related stress can cause fatigue, sleep disorders, mistakes and moral distress.<sup>20</sup> Long-term effects of high work pressure include burnout, depression and post-traumatic stress, resulting in dropout due to illness and abandonment of paid employment.<sup>21 22</sup> A recent Dutch study among intensivists reported a moderate risk for burnout (14.8%).<sup>23</sup> Furthermore, recovery time—regaining strength after an intensive period at work—has been associated with physical and mental well-being,<sup>24</sup> as a long recovery time is an early indicator of work-related stress and exhaustion.<sup>25</sup> In contrast to high workload, stress and less recovery

time, vitality, resilience and job satisfaction were described as characteristics of professionals that counterbalance work-related stress.<sup>26 27</sup> These characteristics could strengthen professionals' mental and physical well-being and their retention for work.<sup>28–30</sup> Therefore, professionals with a high level of vitality and resilience seemed more resistant to work pressure.

### Interventions among healthcare professionals during the COVID-19 pandemic

A wide variety of studies have examined interventions to reduce the work-related stress of healthcare professionals during the COVID-19 pandemic. Providing personal protective equipment is the top priority, followed by fulfilling the psychological needs of professionals.<sup>31</sup> To support mental health and promote the vitality of healthcare professionals, various interventions, including buddy systems, peer support, coaching and easily accessible psychological help, were proposed during the first months of COVID-19 wave.<sup>7 32–36</sup> Other individual interventions, such as telemedicine activities, e-package and self-help books, appeared promising.<sup>37–40</sup> For example, a hospital in China offered online courses to help medical professionals to deal with psychological problems.<sup>41</sup> Many interventions have taken an individual approach, but system-level changes in healthcare organisations seemed to have a wider reach than individual support.<sup>42</sup> A notable omission in the literature is that protective factors were given limited attention: the focus is on the stressors. Many possible interventions were likely to support professionals in times of a pandemic, however, it is not clear which intervention matches the needs of the professional most closely. Therefore, a study was set-up to investigate which supportive interventions, system changes and other supportive factors could meet individual needs during and in the aftermath of the COVID-19 pandemic in a large academic hospital in the Netherlands.

### Objectives

The overall goal of the explorative study is to gain insight into the risk and protective factors as well as the needs and barriers in the working environment related to the promotion of the vitality and resilience of employees. Our objective is to assess levels of vitality and resilience, and the need for support or resources among professionals with a focus on professionals working in ICUs, COVID-19 departments, homeworkers and infection prevention units. Furthermore, to gain more insight into the relationship of vitality and resilience with factors such as self-perceived health, stress, burnout, post-traumatic stress and need for recovery. The aim of the current paper is to describe the protocol of this explanatory mixed-methods study.

## METHODS AND ANALYSIS

### Study design

A mixed-methods design, using both quantitative (substudy I) and qualitative methods (substudy II), is

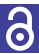

1 applied. Substudy I is a cross-sectional online survey  
2 administered first in October 2020, when the second wave  
3 of the COVID-19 pandemic was upcoming and ongoing,  
4 followed with measurements in March and September  
5 2021. Substudy II includes focus group interviews among  
6 nurses, doctors and professionals regarding the ICU,  
7 COVID-19 departments and the infection prevention  
8 unit during the end of 2020.

## 9 **Setting**

10 The study setting is a large academic hospital in the  
11 Netherlands.

## 12 **Study population**

### 13 **Substudy I**

14 The population consists of a random sample drawn  
15 based on voluntary participation of four target groups:  
16 professionals working at the COVID-19 department, non-  
17 COVID-19 departments, managers and homeworkers. A  
18 convenience sample has been used to monitor the health  
19 of the hospital workers, as was also done in comparable  
20 studies performed during the COVID-19 pandemic.<sup>43 44</sup>

21 We estimated the sample size of the consecutive quanti-  
22 tative measurements as 25% of the healthcare workers in  
23 the four target groups. Several organisational strategies  
24 will be followed to stimulate participation and reach the  
25 threshold of the aimed response rates.

### 26 **Substudy II**

27 The population for the focus groups are the front-  
28 line workers. Maximum variation sampling is used,  
29 with respect to the type of frontline departments (ICU,  
30 COVID-19 departments, infection prevention unit) and  
31 occupational groups (physicians, nurses and infection  
32 prevention experts), resulting in six focus groups.

33 The inclusion criteria for the entire study are (1)  
34 a minimum age of 18 years and (2) sufficient Dutch  
35 language proficiency to complete the questionnaires or  
36 to discuss the relevant topic.

## 37 **Patient and public involvement**

38 No patient involved.

## 39 **Study procedures**

### 40 **Substudy I: Online survey**

41 Hospital employees are informed about the study in  
42 several ways. The communication strategy is tailored to  
43 each target group and supported by the communication  
44 department of the organisation. A link to the online  
45 survey is published on the intranet of the organisation,  
46 printed QR-codes containing a link to the survey are avail-  
47 able at the coffee corners and canteens, announcements  
48 are made in the weekly COVID-19 livestream and by team  
49 management via personal email. Participation is volun-  
50 tary and can be performed during working hours.

51 The online questionnaire starts with information about  
52 the study, privacy statements and an informed consent  
53 form for participation. After providing consent, partic-  
54 ipants are asked to fill out the entire questionnaire,

55 which consists of two parts. The first part is generic for all  
56 employees and takes approximately 6 min to complete; it  
57 includes questions on demographic information and the  
58 main outcomes. The second part consists of additional  
59 modules on working conditions and health and takes  
60 approximately 7 min. Nurses and homeworkers receive  
61 an additional module tailored to their specific work  
62 environment.

### 63 **Substudy II: focus groups**

64 In total, six focus groups with 6–10 participants  
65 that take approximately 60 min are conducted. ICU  
66 doctors, ICU nurses, microbiologists, hospital hygien-  
67 ists, COVID-19 unit nurses and COVID-19 unit doctors  
68 (lung specialists and specialists internal medicine) are  
69 individually invited to participate in one of the focus  
70 groups through consultation with the team managers.  
71 These meetings are preferably in-person (to observe  
72 non-verbal attitude and facial expressions), but due to  
73 the COVID-19 measures and social distancing, it may  
74 not be possible for participants to be physically present.  
75 In those cases, the focus groups are carried out via video  
76 calling technology.

77 Prior to the meetings, a topic list is created by the  
78 research group based on the literature and internal  
79 reports on the experiences of professionals. This topic  
80 list is used to guide and structure the meeting. The  
81 aim of the focus group is to study protective factors  
82 that contribute to vitality and resilience during the  
83 COVID-19 pandemic. Furthermore, possible interven-  
84 tions to increase vitality and resilience are explored and  
85 elaborated on. Written informed consent is given prior  
86 to the meeting, and two experienced researchers guide  
87 the meetings. The focus group interviews are recorded  
88 and transcribed verbatim.

## 89 **Measurements**

90 This paragraph lists all measurement instruments  
91 included in the questionnaire. The first part consists  
92 of measuring instruments addressing demographics,  
93 primary outcomes (ie, vitality, resilience and needs assess-  
94 ment) and several secondary outcomes (ie, self-perceived  
95 health, stress, burnout, post-traumatic stress and need for  
96 recovery). The second part consists of separate modules  
97 for homeworkers and nurses with regard to work ability,  
98 working conditions, job satisfaction, work–private balance,  
99 exposure to COVID-19 at work, preventive measures for  
100 COVID-19 and career perspectives.

## 101 **Demographics**

102 Gender, age, educational level, job titles, work location  
103 and professionals' experience (in years) are assessed.  
104 Educational level is divided into three levels: low, medium  
105 and high educational level. In total, the list of job titles  
106 includes 23 positions within the academic hospital (eg,  
107 nurse, Information Technology (IT) specialist employee,  
108 pharmacist, educator, researcher).

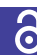

## Main outcome measures

### *Vitality*

Vitality is measured with four items from the original 36-item Short Form Health Survey.<sup>45</sup> The total summed score of four items that refer to the past 4 weeks: 'Did you feel full of liveliness?', 'Did you have a lot of energy?', 'Did you feel worn out?' and 'Did you feel tired?'. The answers are rated on a six-point scale from 1 (=constantly) to 6 (=never).<sup>46</sup> Higher scores indicating a better subjective vitality.

### *Resilience*

Resilience (the ability to cope with stress, setbacks or difficulties at work) is measured with six items from the Psychological Capital Questionnaire.<sup>47</sup> The items contain statements such as: 'When I have a setback at work, I have a hard time getting back on track and moving on', 'If necessary, I can work well without the help of others' and 'I can handle difficult moments at work'. The six items are scored from 1 (=strong disagreement) to 6 (=strong agreement). Higher values indicate a higher level of resilience.

### *Needs assessment*

Needs are measured with a self-designed scale with four items. Examples of questions are: 'In which area would you like to be supported?' and 'What would this support look like?' and 'What should be offered or developed?'. A predefined list includes 10 individual-related and 14 organisational-related answer options, for example, support for working from home, time management and work-private balance.

## Other outcome measures

### *Self-perceived health*

Self-rated health is assessed with one question: 'In general, how would you say your health is?' Answer options from 1 (=excellent) to 5 (=poor).

### *Stress*

Stress is measured with a numeric rating scale. The stress score, ranging from 0 (=no stress at all) to 100 (=the worst stress imaginable). This scale is used to retrospectively objectify stress before, during and after the first COVID-19 outbreaks. The three item question was 'How did you experience the stress before/during/after the COVID-19 crisis on a scale from 0 to 10?'

### *Burnout*

Burnout is measured using five items, that are based on an adapted version of the Utrecht Burnout Scale.<sup>48</sup> The items refer to the current situation such as 'I feel emotionally drained from my job' and 'I feel completely exhausted from my work'. The answer options from 1 (=never) to 7 (=daily).

### *Post-traumatic stress*

Post-traumatic stress is assessed with the post-traumatic stress disorder (PTSD) Checklist for the Diagnostic and

Statistical Manual of Mental Disorders (DSM- version V) (PCL-5)—COVID-19 version with 20 items.<sup>49</sup> This scale consists of 20 items, measuring PTSD symptoms, with scoring options from 0 (=not all) to 4 (=extremely) and was adapted to the COVID-19 situation. A score of 33 or higher is perceived indicative for PTSD.

### *Need for recovery*

Work fatigue and the risk of psychological symptoms are measured using the Dutch questionnaire on the Experience and Evaluation of Work (Dutch abbreviation: VBBA).<sup>50 51</sup> The need for recovery scale consists of 11 dichotomous items (yes/no), representing short-term effects of a working day.<sup>24 52 53</sup> The score of the need for recovery scale ranges from 0 to 100 and is calculated as the sum of points (1 = yes, 0 = no) divided by the number of questions answered, multiplied by 100. Higher scores indicate a higher need for recovery, which is unfavourable.

### *Work ability*

Work ability is measured with the Work Ability Index (WAI).<sup>54</sup> This widely used index measures self-assessed work ability and consists of seven items. Because the subitems of the WAI can also be used as a simple indicator for work ability,<sup>55</sup> three of the seven items are used: current work ability (one item), and work ability in relation to physical and mental job demands (two items). A total WAI score (range: 2–20) is obtained by adding the weight scores of these individual items.<sup>56</sup>

### *Working conditions*

Aspects of work load in the current study are: job autonomy, emotional job demands, social support and physical working conditions.

Job autonomy is measured with six items on a three point scale (no; yes, sometimes; yes, regularly). Five items, that is, those about making decisions, having to find solutions and being able to take time off, are based on the Job Content Questionnaire.<sup>57 58</sup> One item on autonomy related to working time based on the Netherlands Working Conditions Survey, is also included in the questionnaire.<sup>59</sup>

Emotional job demands are evaluated with four items. Three items are derived from the Copenhagen Psychosocial Questionnaire and assess whether the work leads to emotionally difficult situations, the emotional demands of the job and emotional involvement in work. An additional item is 'Is your job more emotionally demanding because of COVID-19?'. All items are measured on a four-point scale (never to always).<sup>60</sup>

Social support is defined as whether colleagues and supervisors are willing to help and listen to work-related problems and is assessed using four items from COPSOQ.<sup>60</sup> Social support is measured on four-point Likert scales from 1 (=almost never) to 5 (=always).

Physical work loads are measured with one self-designed question and assess whether a worker received more or less physically demanding work due to COVID-19

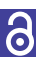

measures. This scale has three answer options (no; yes, sometimes; yes, regularly).

#### *Job satisfaction*

Job satisfaction is measured with one item: 'Altogether, how satisfied are you with your work?' The answer options range from 1 (very dissatisfied) to 5 (very satisfied).

#### *Work-private life balance*

Work-private life balance is measured with two questions on the mutual interference between work and home life. The questions are adopted from the Netherlands Working Conditions Survey,<sup>59</sup> but were originally constructed by Fox and Dwyer (1999).<sup>61</sup> Both questions have four answer options ranging from 1 (=no, never) to 4 (=very often).

#### *Exposure to COVID-19 at work*

Professionals are asked to what extent they might have been exposed to COVID-19 at the worksite. These questions are derived from the Netherlands Working Conditions Survey COVID-19,<sup>62</sup> based on questionnaires developed within the OMEGA network.<sup>63</sup> Participants are asked if they work with patients, the average number of patients they work with during a typical working day in the last week, and if these patients are suspected to have or had been diagnosed with COVID-19. Additionally, participants are asked if and with how many workers they work on a regular basis with colleagues, and if they share tools or surfaces with their colleagues.

#### *Preventive measures for COVID-19*

The five questions on preventive measures with regard to COVID-19 are derived from the Netherlands Working Conditions Survey COVID-19.<sup>62</sup> One general question assesses the general measures taken at the department level with regard to the COVID-19 pandemic, with answer options such as homeworking, adjustment of working hours, general preventive measures in the workplace, mandatory inclusion or withdrawal of leave. The specific questions on preventive measures include the possibility of keeping a 1.5 m distance between colleagues and/or patients, the availability of personal protective equipment, the usage of personal protective equipment and the application of general hygiene measures. The responses to these five questions are never, sometimes, often and always. This module will not be applied to homeworkers.

#### *Career perspective*

Three items on career perspective are derived from the Netherlands Working Conditions Survey COVID-19<sup>62</sup> and adjusted to fit the study population working in the hospital. These items include the motivation to work in the healthcare sector in the future (responses: less, equal and more), the intention to change jobs within the healthcare sector and the intention to change jobs outside the healthcare sector with responses ranging from 1 (=certainly not) to 5 (=certainly yes).

#### *Outcome measures for pre-defined groups or professions*

##### *Nurse questionnaire*

The Practice Environment Scale of the Nursing Work Index is the most widely used measure to gauge the state of nursing practice environments.<sup>64 65</sup> It is the only measure recommended by several organisations promoting quality healthcare. The 15-item questionnaire uses responses ranging from 1 (=strongly disagree) to 4 (=totally agree). This module will be applied to nurses only.

##### *Homeworkers*

A total of eight items are specifically tailored to homeworkers. Two items refer to the number of hours in a week people work from home and how many hours a day they work on a screen (eg, laptop and tablet). One item is focused on the availability of ergonomic work equipment at home (a desk or table with a comfortable working height, a chair that can be adjusted to one's body measurements, a separate display and a separate computer mouse). The need for other furniture is assessed with one item 'Do you need additional materials for a good home workplace?'. Moreover, participants are asked if they take (short) breaks on a working day, except for a lunch break?'. This question includes the following answer options: 1 (=yes, regularly), 2 (=yes, sometimes) and 3 (=no). The last three items are about concentration while at home and include the following statements: 'Do you have trouble concentrating while working?', 'Do you struggle to keep your attention while you work?' and 'Do you have difficulty with the reduced social contact with colleagues?' Answer options range from 1 (=never) to 4 (=always).

#### **Data handling and statistical analyses**

##### *Sub study I*

Survey data are anonymously collected using Lime-survey (V.2.06 lts Build 160524) and exported to a secure SPSS database (IBM SPSS Statistics for Windows, V.25.0. Armonk, New York: IBM Corp) for analysis. All principal investigators have access to the final study dataset. Data will be stored for 15 years.

First, the data are cleaned and checked for missing data. The descriptive statistics are presented as numbers and percentages for dichotomous variables and mean and SD for continuous variables. Data for different subgroups (professionals in COVID-19 departments, non-COVID-19 departments, managers and homeworkers) are analysed with the Mann-Whitney test or t-tests. Linear and logistics regression analyses are performed to investigate the associations between risk factors and the main outcomes (vitality and resilience). Statistical significance will be defined as  $p < 0.05$ .

##### *Sub study II*

Focus groups data will be analysed by means of thematic content analysis.<sup>66</sup> This method organises and describes the dataset in rich detail and investigates patterns of response or meaning within the dataset. We take an

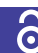

1 inductive approach to identify possible themes. Once a  
2 satisfactory thematic map is established, the themes are  
3 examined to identify the 'essence' of what each individual  
4 theme is about and to understand how they are inter-  
5 related in relation to our research question. To achieve  
6 this, the following steps will be taken.

7 Focus group interview data are audiotaped and tran-  
8 scribed verbatim.<sup>66</sup> Two researchers will read the tran-  
9 scriptions in detail. Each of them starts with developing a  
10 structured analysis framework that consists of preliminary  
11 codes and themes. They make use of mind maps and  
12 tables to organise the data. After that, they compare their  
13 frameworks to reach consensus. Next, one researcher  
14 codes the transcripts line by line according to this  
15 framework in the software programme NVivo V.12. The  
16 coder uses memos for comments during coding. When  
17 coding is finished and the code 'other' is used, the two  
18 researchers discuss these codes and rename them into a  
19 new or existing code name best reflecting the contents of  
20 the otherwise uncategorised text fragment. During and  
21 after coding, the two researchers review and check the  
22 themes for internal homogeneity and external heteroge-  
23 neity. Finally, the two researchers analyse the cohesion  
24 and inter-relations between themes to come to a coherent  
25 account and accompanying narrative of the data. The  
26 principal investigators have access to these data, which  
27 will be stored for 15 years.

## 28 ETHICS AND DISSEMINATION

29 The study is approved by the Medical Ethics Committee of  
30 the Erasmus MC (MEC-2020-0705). It will be conducted  
31 according to the principles of the Declaration of Helsinki  
32 (64th WMA General Assembly, Fortaleza, Brazil, October  
33 2013) and in accordance with the Medical Research  
34 Involving Human Subjects Act. The study complies with  
35 the Netherlands Code of Conduct for Scientific Practice  
36 from the Association of Universities in the Netherlands.  
37 Protocol modifications will be communicated and to  
38 the Medical Ethics Committee by protocol amendment.  
39 Participants will be informed about the study both orally  
40 and by letter. Consent for participation will be given by  
41 written informed consent. Participants can leave the study  
42 at any time for any reason if they wish to do so without  
43 any consequences. The withdrawal will be registered for  
44 informative purpose.

## 45 DISCUSSION

46 The consequences of the COVID-19 crisis on the mental  
47 health and working conditions of healthcare profes-  
48 sionals have been recognised worldwide.<sup>67</sup> Hospital  
49 employees with vitality experience less work-related  
50 stress and can therefore handle more work in the new  
51 and stressful circumstance. In other words, maintaining  
52 professionals' vitality and resilience will contribute to  
53 healthcare quality. By using a mixed-methods approach,  
54 we aim to gain an overview of vitality, resilience and

health (eg, stress and burnout) among healthcare profes-  
sionals, as well as the risk factors associated with these  
outcomes. The COVID-19 pandemic has put an extra  
focus on the impact of work-related stress and how to  
deal with its causes and consequences. Even though the  
pandemic entails a specific surge of specific patients, and  
as such may hamper generalisability, we believe that the  
outcomes of this study will add to the body of knowledge  
on how best to deal with the work-related stress experi-  
enced by healthcare workers worldwide.

This is an urgent and rushed study because we wanted  
to use the results against the same health crisis that we are  
investigating. Based on this study, directions for future  
interventions during the COVID-19 pandemic and there-  
after could provide raised levels of vitality and resilience  
of professionals in the hospital, and therewith support  
their employability in the long run.

## 55 Strengths and limitations

The first strength is the mixed-methods design, consisting  
of qualitative and quantitative methods which provide  
a more in-depth insight in the need for support in the  
exploratory study and therewith details the information  
to develop interventions. Second, we compare different  
departments and distinguish healthcare workers,  
managers, and homeworkers. The majority of studies so  
far focused exclusively on the needs of healthcare profes-  
sionals without considering other hospital employees  
such as supportive staff, researchers and managers.

The COVID-19 pandemic was the motivation for this  
research, but may also have limited the procedure of this  
study, given its unpredictable course. During the writing  
of this protocol paper, the second wave of COVID-19 had  
already started in the Netherlands. Therefore, a lower  
response rate is not unexpected from the frontline health-  
care workers. The second limitation is the cross-sectional  
design of the study, which makes it impossible to draw  
causal conclusions from this report and to investigate the  
long-term effects.

## 60 Data dissemination

Public access to the study protocol, study details,  
participant-level dataset and statistical code can be  
acquired from the corresponding author. The results  
will be disseminated to healthcare professionals, health  
services authorities and the public via presentations  
at national and international meetings and published  
in peer-reviewed journals. A lay summary of the results  
will be written and shared with all professionals of the  
organisation.

## 65 Study status

The study is currently ongoing with data recruitment.

## 70 Author affiliations

<sup>1</sup>Intensive Care Adults, Erasmus Medical Center, Rotterdam, Zuid-Holland, The Netherlands

<sup>2</sup>Department of Psychiatry, Section Medical Psychology, Erasmus Medical Center, Rotterdam, The Netherlands

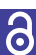

<sup>3</sup>Department of Pediatrics, Erasmus Medical Center, Rotterdam, The Netherlands  
<sup>4</sup>Department of Occupational Health, Erasmus Medical Center, Rotterdam, The Netherlands  
<sup>5</sup>Department of Psychiatry, Erasmus Medical Center, Rotterdam, The Netherlands  
<sup>6</sup>Netherlands Organization for Applied Scientific Research TNO, Leiden, The Netherlands

**Acknowledgements** The authors would like to thank all participating respondents for their involvement in the study.

**Contributors** MVM, TAK-P, JJVB and LK jointly designed the study, raised funding and established the development of the study protocol. MVM, MdV, TAK-P, KOH and LK prepared the study materials. MVM, MdV and LK gathered the data of both substudies and produced the first draft of the article outline together with KOH and TAK-P. All authors (MVM, MdV, AdP, TAK-P, JJVB, WJGH, KOH and LK) contributed substantially to the concept of the study, the analyses of literature, critically revised the content of the manuscript, have read and approved the final version.

**Funding** This work was internally supported by the board of Erasmus MC (no grant number applicable).

**Competing interests** None declared.

**Patient and public involvement** Patients and/or the public were not involved in the design, or conduct, or reporting or dissemination plans of this research.

**Patient consent for publication** Not applicable.

**Provenance and peer review** Not commissioned; externally peer reviewed.

**Open access** This is an open access article distributed in accordance with the Creative Commons Attribution Non Commercial (CC BY-NC 4.0) license, which permits others to distribute, remix, adapt, build upon this work non-commercially, and license their derivative works on different terms, provided the original work is properly cited, appropriate credit is given, any changes made indicated, and the use is non-commercial. See: <http://creativecommons.org/licenses/by-nc/4.0/>.

#### ORCID iD

Margo van Mol <http://orcid.org/0000-0002-0213-6054>

#### REFERENCES

- Azoulay E, De Waele J, Ferrer R, *et al*. Symptoms of burnout in intensive care unit specialists facing the COVID-19 outbreak. *Ann Intensive Care* 2020;10:1–8.
- Kok N, Hoedemaekers A, van der Hoeven H, *et al*. Recognizing and supporting morally injured ICU professionals during the COVID-19 pandemic. *Intensive Care Med* 2020;46:1653–4.
- Pappa S, Ntella V, Giannakas T, *et al*. Prevalence of depression, anxiety, and insomnia among healthcare workers during the COVID-19 pandemic: a systematic review and meta-analysis. *Brain Behav Immun* 2020;88:901–7.
- Lai J, Ma S, Wang Y, *et al*. Factors associated with mental health outcomes among health care workers exposed to coronavirus disease 2019. *JAMA Netw Open* 2020;3:e203976.
- Solms L, van Vianen AEM, Theeboom T, *et al*. Keep the fire burning: a survey study on the role of personal resources for work engagement and burnout in medical residents and specialists in the Netherlands. *BMJ Open* 2019;9:e031053.
- Prins JT, Hoekstra-Weebers JEHM, van de Wiel HBM, *et al*. Burnout among Dutch medical residents. *Int J Behav Med* 2007;14:119–25.
- Rieckert A, Schuit E, Bleijenberg N, *et al*. How can we build and maintain the resilience of our health care professionals during COVID-19? recommendations based on a scoping review. *BMJ Open* 2021;11:e043718.
- Gold JA. Covid-19: adverse mental health outcomes for healthcare workers. *Brit Med J Publish Group* 2020;369:m1815.
- Bagnasco A, Zanini M, Hayter M, *et al*. COVID 19—A message from Italy to the global nursing community. *JAN* 2020.
- Murthy S, Gomersall CD, Fowler RA. Care for critically ill patients with COVID-19. *JAMA* 2020;323:1499–500.
- Joly H. Lead your team into a post-pandemic world. *Harvard Business Review* 2020;8.
- Kniffin KM, Narayanan J, Anseel F, *et al*. COVID-19 and the workplace: implications, issues, and insights for future research and action. *Am Psychol* 2021;76:63–77.
- Maunder R, Hunter J, Vincent L, *et al*. The immediate psychological and occupational impact of the 2003 SARS outbreak in a teaching hospital. *CMAJ* 2003;168:1245–51.
- Ulrich CM. Ebola is causing moral distress among African healthcare workers. *BMJ* 2014;349:g6672.
- Wu P, Fang Y, Guan Z, *et al*. The psychological impact of the SARS epidemic on hospital employees in China: exposure, risk perception, and altruistic acceptance of risk. *Can J Psychiatry* 2009;54:302–11.
- Bukhari EE, Temsah MH, Aleyadhy AA, *et al*. Middle East respiratory syndrome coronavirus (MERS-CoV) outbreak perceptions of risk and stress evaluation in nurses. *J Infect Dev Ctries* 2016;10:845–50.
- Zhu Z, Xu S, Wang H. COVID-19 in Wuhan: immediate psychological impact on 5062 health workers. *MedRxiv* 2020.
- Xiao H, Zhang Y, Kong D, *et al*. The effects of social support on sleep quality of medical staff treating patients with coronavirus disease 2019 (COVID-19) in January and February 2020 in China. *Med Sci Monit* 2020;26:923549–1.
- Zhang Y, Wang C, Pan W, *et al*. Stress, burnout, and coping strategies of frontline nurses during the COVID-19 epidemic in Wuhan and Shanghai, China. *Front Psychiatry* 2020;11:1154.
- De Villers MJ, DeVon HA. Moral distress and avoidance behavior in nurses working in critical care and noncritical care units. *Nurs Ethics* 2013;20:589–603.
- Moss M, Good VS, Gozal D, *et al*. An official critical care societies collaborative statement: Burnout syndrome in critical care health care professionals: a call for action. *Am J Crit Care* 2016;25:368–76.
- van Mol MMC, Kompanje EJO, Benoit DD, *et al*. The prevalence of compassion fatigue and burnout among healthcare professionals in intensive care units: a systematic review. *PLoS One* 2015;10:e0136955.
- Meynaar IA, Ottens T, Zegers M, *et al*. Burnout, resilience and work engagement among Dutch intensivists in the aftermath of the COVID-19 crisis: a nationwide survey. *J Crit Care* 2021;62:1–5.
- Graham B, Cottey L, Smith JE, *et al*. Measuring 'Need for Recovery' as an indicator of staff well-being in the emergency department: a survey study. *Emerg Med J* 2020;37:555–61.
- Nieuwenhuijsen K, Sluiter JK, Dewa CS. Need for recovery as an early sign of depression risk in a working population. *Int J Occup Environ Med* 2016;58:e350–4.
- van Mol MMC, Nijkamp MD, Bakker J, *et al*. Counterbalancing work-related stress? work engagement among intensive care professionals. *Aust Crit Care* 2018;31:234–41.
- Schaufeli WB, Salanova M, González-romá V, *et al*. The measurement of engagement and burnout: a two sample confirmatory factor analytic approach. *J Happiness Stud* 2002;3:71–92.
- Schaufeli WB. Engaging leadership in the job demands-resources model. *Career Development International* 2015;20:446–63.
- Bakker AB, Demerouti E, Sanz-Vergel AI. Burnout and work engagement: the JD-R approach. *Annu. Rev. Organ. Psychol. Organ. Behav.* 2014;1:389–411.
- Yu F, Raphael D, Mackay L, *et al*. Personal and work-related factors associated with nurse resilience: a systematic review. *Int J Nurs Stud* 2019;93:129–40.
- Santarone K, McKenney M, Elkbuli A. Preserving mental health and resilience in frontline healthcare workers during COVID-19. *Am J Emerg Med* 2020;38:1530–1.
- Ministerie van Defensie. Tips & adviezen voor de mentale gezondheid van zorgprofessionals. Retrieved from. Available: <https://www.waardigheidentrots.nl/wp-content/uploads/2020/03/Flyer-Mentale-Gezondheid-zorgprofessionals-tijdens-corona.pdf>
- Hu Y-Y, Fix ML, Hevelone ND, *et al*. Physicians' needs in coping with emotional stressors: the case for peer support. *Arch Surg* 2012;147:212–7.
- Albott CS, Wozniak JR, McGlinch BP. Battle Buddies: rapid deployment of a psychological resilience intervention for health care workers during the coronavirus disease 2019 pandemic. *Anesth Analg* 2020.
- Leszcz M, Maunder R, Hunter J. Psychological support for health care workers during the COVID-19 pandemic. *CMAJ* 2020;192:E660.
- Kisely S, Warren N, McMahon L, *et al*. Occurrence, prevention, and management of the psychological effects of emerging virus outbreaks on healthcare workers: rapid review and meta-analysis. *BMJ* 2020;369:m1642.
- Jing H, Fangkun L, Ziwei T, *et al*. Care for the psychological status of frontline medical staff fighting against COVID-19. *Clin Infect Dis* 2020;71.
- Percudani M, Corradin M, Moreno M. Mental health services in Lombardy during COVID-19 outbreak. *Psychiatry Res* 2020;112980.
- Kang L, Ma S, Chen M, *et al*. Impact on mental health and perceptions of psychological care among medical and nursing staff in Wuhan during the 2019 novel coronavirus disease outbreak: a cross-sectional study. *Brain Behav Immun* 2020;87:11–17.

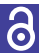

- 40 Blake H, Bermingham F, Johnson G, *et al.* Mitigating the psychological impact of COVID-19 on healthcare workers: a digital learning package. *Int J Environ Res Public Health* 2020;17:2997.
- 41 Chen Q, Liang M, Li Y, *et al.* Mental health care for medical staff in China during the COVID-19 outbreak. *Lancet Psychiatry* 2020;7:e15–16.
- 42 Wu PE, Styra R, Gold WL. Mitigating the psychological effects of COVID-19 on health care workers. *CMAJ* 2020;192:E459–60.
- 43 Heesakkers H, Zegers M, van Mol MMC, *et al.* The impact of the first COVID-19 surge on the mental well-being of ICU nurses: a nationwide survey study. *Intensive Crit Care Nurs* 2021;65:103034.
- 44 Cag Y, Erdem H, Gormez A, *et al.* Anxiety among front-line health-care workers supporting patients with COVID-19: a global survey. *Gen Hosp Psychiatry* 2021;68:90–6.
- 45 Ware JE, Sherbourne CD. The mos 36-item short-form health survey (SF-36). I. conceptual framework and item selection. *Med Care* 1992;30:473–83.
- 46 van der Zee KI, Sanderman R. *Measuring health status with the RAND-36. A manual. [Het meten van de gezondheidstoestand met de RAND-36. Een handleiding]*, Groningen, 1993.
- 47 Luthans F, Avolio BJ, Avey JB, *et al.* Positive psychological capital: measurement and relationship with performance and satisfaction. *Pers Psychol* 2007;60:541–72.
- 48 Schaufeli WB, Dierendonck DV. Utrecht Burnout Scale [Utrechtse Burnout Schaal] (UBOS). *De psycholoog* 2001;6:9–12.
- 49 Weathers FW, Litz BT, Keane TM. The PTSD checklist for DSM-5 (pcl-5). scale available from the National center for PTSD. Available: <https://www.ptsd.va.gov/professional/assessment/adult-sr/ptsd-checklist.asp>
- 50 Broersen JPJ, Fortuin RJ, Dijkstra L. Health and Safety Covenants Monitor: key figures and limit values [Monitor Arboconvenanten: kengetallen en grenswaarden]. *TBV–Tijdschrift voor Bedrijfs- en Verzekeringsgeneeskunde* 2004;12:104–8.
- 51 Mv V, Meijman MT. *Measuring psychosocial workload with a questionnaire: the questionnaire perception and assessment of work [Het meten van psychosociale arbeidsbelasting met een vragenlijst: de vragenlijst beleving en beoordeling van de arbeid]*. Nederlands Instituut voor Arbeidsomstandigheden, 1994.
- 52 Jansen NWH, Kant IJ, van den Brandt PA. Need for recovery in the working population: description and associations with fatigue and psychological distress. *Int J Behav Med* 2002;9:322–40.
- 53 Moriguchi CS, Trevizani T, de Fátima Carreira Moreira R, *et al.* Need for recovery assessment among nursing professionals and call center operators. *Work* 2012;41 Suppl 1:4838–42.
- 54 Ilmarinen J. Ageing workers in Finland and in the European Union: their situation and the promotion of their working ability, Employability and employment. *Issues and Practice* 1999;26:623–41.
- 55 Ahlstrom L, Grimby-Ekman A, Hagberg M, *et al.* The work ability index and single-item question: associations with sick leave, symptoms, and health – a prospective study of women on long-term sick leave. *Scand J Work Environ Health* 2010;36:404–12.
- 56 Tuomi K, Ilmarinen J, Jahkola A. Work ability index. Helsinki: Finnish Institute of occupational health; 1998. *Occup Health Care* 1998;19.
- 57 Karasek R. *Job Content Questionnaire user's guide*. Department of Work Environemnt, 1985.
- 58 Karasek R, Brisson C, Kawakami N, *et al.* The job content questionnaire (JCQ): an instrument for internationally comparative assessments of psychosocial job characteristics. *J Occup Health Psychol* 1998;3:322–55.
- 59 Hoofman WE, Mars GMJ, Knops JCM, *et al.* *National Working Conditions Survey 2019. Methodology and global results [Nationale Enquête Arbeidsomstandigheden 2019. Methodologie en globale resultaten]*. TNO; CBS, 2020.
- 60 Kristensen TS, Borg V. Copenhagen psychosocial questionnaire (COPSOQ). *Mental Health* 2003;5:5.
- 61 Fox ML, Dwyer DJ. An investigation of the effects of time and involvement in the relationship between stressors and work-family conflict. *J Occup Health Psychol* 1999;4:164–74.
- 62 Bouwens L, Zoomer T, Hoofman W, *et al.* *Reading guide National Working Conditions Survey - COVID-19 [Leeswijzer Nationale Enquête Arbeidsomstandigheden – COVID-19]*. Leiden, The Netherlands: TNO, 2020.
- 63 OMEGA-NET. COVID-19 and OMEGA-NET, 2020. Available: <https://omeganetcohorts.eu/resources/covid19-and-omega/>
- 64 Lake ET. Development of the practice environment scale of the nursing work index. *Res Nurs Health* 2002;25:176–88.
- 65 Zangaro GA, Jones K. Practice environment scale of the nursing work index: a reliability generalization meta-analysis. *West J Nurs Res* 2019;41:1658–84.
- 66 Braun V, Clarke V. Using thematic analysis in psychology. *Qual Res Psychol* 2006;3:77–101.
- 67 Morgantini LA, Naha U, Wang H, *et al.* Factors contributing to healthcare professional burnout during the COVID-19 pandemic: a rapid turnaround global survey. *medRxiv* 2020. doi:10.1101/2020.05.17.20101915. [Epub ahead of print: 22 May 2020].

## Standards for Reporting Qualitative Research (SRQR)\*

<http://www.equator-network.org/reporting-guidelines/srqr/>

Page/line no(s).

### Title and abstract

|                                                                                                                                                                                                                                                              |                  |
|--------------------------------------------------------------------------------------------------------------------------------------------------------------------------------------------------------------------------------------------------------------|------------------|
| <p><b>Title</b> - Concise description of the nature and topic of the study Identifying the study as qualitative or indicating the approach (e.g., ethnography, grounded theory) or data collection methods (e.g., interview, focus group) is recommended</p> | <p>1/1-2</p>     |
| <p><b>Abstract</b> - Summary of key elements of the study using the abstract format of the intended publication; typically includes background, purpose, methods, results, and conclusions</p>                                                               | <p>2-3/27-54</p> |

### Introduction

|                                                                                                                                                                     |                |
|---------------------------------------------------------------------------------------------------------------------------------------------------------------------|----------------|
| <p><b>Problem formulation</b> - Description and significance of the problem/phenomenon studied; review of relevant theory and empirical work; problem statement</p> | <p>4/90-95</p> |
| <p><b>Purpose or research question</b> - Purpose of the study and specific objectives or questions</p>                                                              | <p>5/96-97</p> |

### Methods

|                                                                                                                                                                                                                                                                                                                                                                                                             |                  |
|-------------------------------------------------------------------------------------------------------------------------------------------------------------------------------------------------------------------------------------------------------------------------------------------------------------------------------------------------------------------------------------------------------------|------------------|
| <p><b>Qualitative approach and research paradigm</b> - Qualitative approach (e.g., ethnography, grounded theory, case study, phenomenology, narrative research) and guiding theory if appropriate; identifying the research paradigm (e.g., postpositivist, constructivist/ interpretivist) is also recommended; rationale**</p>                                                                            | <p>6/131-144</p> |
| <p><b>Researcher characteristics and reflexivity</b> - Researchers' characteristics that may influence the research, including personal attributes, qualifications/experience, relationship with participants, assumptions, and/or presuppositions; potential or actual interaction between researchers' characteristics and the research questions, approach, methods, results, and/or transferability</p> | <p>5/118-120</p> |
| <p><b>Context</b> - Setting/site and salient contextual factors; rationale**</p>                                                                                                                                                                                                                                                                                                                            | <p>5/101-107</p> |
| <p><b>Sampling strategy</b> - How and why research participants, documents, or events were selected; criteria for deciding when no further sampling was necessary (e.g., sampling saturation); rationale**</p>                                                                                                                                                                                              | <p>5/113-117</p> |
| <p><b>Ethical issues pertaining to human subjects</b> - Documentation of approval by an appropriate ethics review board and participant consent, or explanation for lack thereof; other confidentiality and data security issues</p>                                                                                                                                                                        | <p>5/107</p>     |
| <p><b>Data collection methods</b> - Types of data collected; details of data collection procedures including (as appropriate) start and stop dates of data collection and analysis, iterative process, triangulation of sources/methods, and modification of procedures in response to evolving study findings; rationale**</p>                                                                             | <p>6/121-129</p> |



|                       |                                                                                                                                                                                                                                                       |             |
|-----------------------|-------------------------------------------------------------------------------------------------------------------------------------------------------------------------------------------------------------------------------------------------------|-------------|
| 1<br>2<br>3<br>4<br>5 | <b>Data collection instruments and technologies</b> - Description of instruments (e.g., interview guides, questionnaires) and devices (e.g., audio recorders) used for data collection; if/how the instrument(s) changed over the course of the study | S1 Appendix |
| 6<br>7<br>8           | <b>Units of study</b> - Number and relevant characteristics of participants, documents, or events included in the study; level of participation (could be reported in results)                                                                        | Table 1     |
| 9<br>10<br>11<br>12   | <b>Data processing</b> - Methods for processing data prior to and during analysis, including transcription, data entry, data management and security, verification of data integrity, data coding, and anonymization/de-identification of excerpts    | 6/130-144   |
| 13<br>14<br>15<br>16  | <b>Data analysis</b> - Process by which inferences, themes, etc., were identified and developed, including the researchers involved in data analysis; usually references a specific paradigm or approach; rationale**                                 | 6/133-144   |
| 17<br>18<br>19<br>20  | <b>Techniques to enhance trustworthiness</b> - Techniques to enhance trustworthiness and credibility of data analysis (e.g., member checking, audit trail, triangulation); rationale**                                                                | 6/133-144   |

### Results/findings

|                      |                                                                                                                                                                                                   |              |
|----------------------|---------------------------------------------------------------------------------------------------------------------------------------------------------------------------------------------------|--------------|
| 23<br>24<br>25<br>26 | <b>Synthesis and interpretation</b> - Main findings (e.g., interpretations, inferences, and themes); might include development of a theory or model, or integration with prior research or theory | 8-13/176-301 |
| 27<br>28<br>29       | <b>Links to empirical data</b> - Evidence (e.g., quotes, field notes, text excerpts, photographs) to substantiate analytic findings                                                               | 9-12/185-262 |

### Discussion

|                                  |                                                                                                                                                                                                                                                                                                                                                                                                             |               |
|----------------------------------|-------------------------------------------------------------------------------------------------------------------------------------------------------------------------------------------------------------------------------------------------------------------------------------------------------------------------------------------------------------------------------------------------------------|---------------|
| 32<br>33<br>34<br>35<br>36<br>37 | <b>Integration with prior work, implications, transferability, and contribution(s) to the field</b> - Short summary of main findings; explanation of how findings and conclusions connect to, support, elaborate on, or challenge conclusions of earlier scholarship; discussion of scope of application/generalizability; identification of unique contribution(s) to scholarship in a discipline or field | 14-16/332-382 |
| 38<br>39                         | <b>Limitations</b> - Trustworthiness and limitations of findings                                                                                                                                                                                                                                                                                                                                            | 16/382-393    |

### Other

|                |                                                                                                                                               |               |
|----------------|-----------------------------------------------------------------------------------------------------------------------------------------------|---------------|
| 42<br>43<br>44 | <b>Conflicts of interest</b> - Potential sources of influence or perceived influence on study conduct and conclusions; how these were managed | 17-18/402-407 |
| 45<br>46       | <b>Funding</b> - Sources of funding and other support; role of funders in data collection, interpretation, and reporting                      | 17-18/402-405 |

\*The authors created the SRQR by searching the literature to identify guidelines, reporting standards, and critical appraisal criteria for qualitative research; reviewing the reference lists of retrieved sources; and contacting experts to gain feedback. The SRQR aims to improve the transparency of all aspects of qualitative research by providing clear standards for reporting qualitative research.

1  
2  
3  
4  
5  
6  
7  
8  
9  
10  
11  
12  
13  
14  
15  
16  
17  
18  
19  
20  
21  
22  
23  
24  
25  
26  
27  
28  
29  
30  
31  
32  
33  
34  
35  
36  
37  
38  
39  
40  
41  
42  
43  
44  
45  
46  
47  
48  
49  
50  
51  
52  
53  
54  
55  
56  
57  
58  
59  
60

\*\*The rationale should briefly discuss the justification for choosing that theory, approach, method, or technique rather than other options available, the assumptions and limitations implicit in those choices, and how those choices influence study conclusions and transferability. As appropriate, the rationale for several items might be discussed together.

**Reference:**

O'Brien BC, Harris IB, Beckman TJ, Reed DA, Cook DA. **Standards for reporting qualitative research: a synthesis of recommendations.** *Academic Medicine*, Vol. 89, No. 9 / Sept 2014  
DOI: 10.1097/ACM.0000000000000388

For peer review only

# BMJ Open

## The need for support among healthcare professionals during the COVID-19 pandemic: a qualitative study at an academic hospital in the Netherlands

|                                 |                                                                                                                                                                                                                                                                                                                                                                                                                                                                                                                                                                                                                                                                                                                                                                                                                                                              |
|---------------------------------|--------------------------------------------------------------------------------------------------------------------------------------------------------------------------------------------------------------------------------------------------------------------------------------------------------------------------------------------------------------------------------------------------------------------------------------------------------------------------------------------------------------------------------------------------------------------------------------------------------------------------------------------------------------------------------------------------------------------------------------------------------------------------------------------------------------------------------------------------------------|
| Journal:                        | <i>BMJ Open</i>                                                                                                                                                                                                                                                                                                                                                                                                                                                                                                                                                                                                                                                                                                                                                                                                                                              |
| Manuscript ID                   | bmjopen-2021-059124.R1                                                                                                                                                                                                                                                                                                                                                                                                                                                                                                                                                                                                                                                                                                                                                                                                                                       |
| Article Type:                   | Original research                                                                                                                                                                                                                                                                                                                                                                                                                                                                                                                                                                                                                                                                                                                                                                                                                                            |
| Date Submitted by the Author:   | 30-Jan-2022                                                                                                                                                                                                                                                                                                                                                                                                                                                                                                                                                                                                                                                                                                                                                                                                                                                  |
| Complete List of Authors:       | Kranenburg, Leonieke; Erasmus Medical Center, Department of Psychiatry, section Medical Psychology<br>de Veer, Mathijs; Erasmus Medical Center, Department of Psychiatry, section Medical Psychology<br>Oude Hengel, Karen; Erasmus Medical Center, Department of Public Health; Netherlands Organization for Applied Scientific Research TNO, Department of Work, Health and Technology<br>Kouwenhoven-Pasmooij, T.A.; Erasmus Medical Center, Department of Occupational Health<br>de Pagter, Anne; Erasmus MC Sophia Children Hospital, Challenge&Support programme<br>Hoogendijk, Witte; Erasmus Medical Center, Department of Psychiatry, section Medical Psychology<br>Busschbach, Jan; Erasmus Medical Center, Department of Psychiatry, Section of Medical Psychology<br>Van Mol, Margo; Erasmus Medical Center, Department of Intensive Care Adults |
| <b>Primary Subject Heading</b>: | Mental health                                                                                                                                                                                                                                                                                                                                                                                                                                                                                                                                                                                                                                                                                                                                                                                                                                                |
| Secondary Subject Heading:      | Qualitative research, Health services research                                                                                                                                                                                                                                                                                                                                                                                                                                                                                                                                                                                                                                                                                                                                                                                                               |
| Keywords:                       | COVID-19, MENTAL HEALTH, QUALITATIVE RESEARCH                                                                                                                                                                                                                                                                                                                                                                                                                                                                                                                                                                                                                                                                                                                                                                                                                |
|                                 |                                                                                                                                                                                                                                                                                                                                                                                                                                                                                                                                                                                                                                                                                                                                                                                                                                                              |

SCHOLARONE™  
Manuscripts



I, the Submitting Author has the right to grant and does grant on behalf of all authors of the Work (as defined in the below author licence), an exclusive licence and/or a non-exclusive licence for contributions from authors who are: i) UK Crown employees; ii) where BMJ has agreed a CC-BY licence shall apply, and/or iii) in accordance with the terms applicable for US Federal Government officers or employees acting as part of their official duties; on a worldwide, perpetual, irrevocable, royalty-free basis to BMJ Publishing Group Ltd ("BMJ") its licensees and where the relevant Journal is co-owned by BMJ to the co-owners of the Journal, to publish the Work in this journal and any other BMJ products and to exploit all rights, as set out in our [licence](#).

The Submitting Author accepts and understands that any supply made under these terms is made by BMJ to the Submitting Author unless you are acting as an employee on behalf of your employer or a postgraduate student of an affiliated institution which is paying any applicable article publishing charge ("APC") for Open Access articles. Where the Submitting Author wishes to make the Work available on an Open Access basis (and intends to pay the relevant APC), the terms of reuse of such Open Access shall be governed by a Creative Commons licence – details of these licences and which [Creative Commons](#) licence will apply to this Work are set out in our licence referred to above.

Other than as permitted in any relevant BMJ Author's Self Archiving Policies, I confirm this Work has not been accepted for publication elsewhere, is not being considered for publication elsewhere and does not duplicate material already published. I confirm all authors consent to publication of this Work and authorise the granting of this licence.

1  
2  
3 **1 The need for support among healthcare professionals during the COVID-19**  
4  
5  
6 **2 pandemic: a qualitative study at an academic hospital in the Netherlands**  
7  
8  
9 **3**

10  
11 4 Kranenburg LW<sup>1\*</sup>, de Veer MR<sup>1</sup>, Oude Hengel KM<sup>2,3</sup>, Kouwenhoven-Pasmooij TA<sup>4</sup>, de Pagter APJ<sup>5</sup>,  
12  
13 5 Hoogendijk WJG<sup>1</sup>, Busschbach JJ<sup>1</sup>, van Mol MMC<sup>6</sup>  
14  
15 **6**

16  
17  
18 7 1. Department of Psychiatry, Erasmus University Medical Center, Rotterdam, Netherlands  
19

20 8 2. Department of Public Health, Erasmus University Medical Center, Rotterdam, Netherlands  
21

22 9 3. Department of Work, Health and Technology, Netherlands Organisation for Applied Scientific  
23  
24 10 Research TNO, Schipholweg 79-86, 2316, Leiden, Netherlands.  
25

26  
27 11 4. Department of Occupational Health, Erasmus University Medical Center, Rotterdam, Netherlands  
28

29 12 5. Challenge&Support programme, Sophia Childrens Hospital, Erasmus MC University Medical Center,  
30  
31 13 Rotterdam, Netherlands  
32

33 14 6. Department of Intensive Care Adults, Erasmus MC University Medical Center, Rotterdam,  
34  
35 15 Netherlands  
36

37  
38  
39 16 *\* Corresponding author:*

40  
41 17 Leonieke Kranenburg  
42

43 18 Erasmus University Medical Center  
44

45 19 Department of Psychiatry  
46

47  
48 20 P.O. Box 2040, 3000 CA, Rotterdam, Netherlands  
49

50 21 Email address: [l.kranenburg@erasmusmc.nl](mailto:l.kranenburg@erasmusmc.nl)  
51  
52 **22**

53  
54 23 *Short title:*  
55

56 24 Need for support in healthcare professionals during COVID-19.  
57  
58  
59  
60

## Abstract

### *Objectives*

The aim of the current study is to gain insight in the factors that benefit vitality and resilience of healthcare workers during the COVID-19 pandemic, to develop and direct specific support strategies.

### *Design, setting, and participants*

This study applies a qualitative design, consisting of six focus-groups and five interviews among 38 frontline healthcare workers in a large Dutch academic hospital. Included were professionals of the intensive care unit, COVID-19 departments, infection prevention units and facility management services. The study was conducted in October and November 2020, during the second wave of the COVID-19 pandemic.

### *Data analysis*

Thematic analysis was applied to focus group and interview data to gain insight in the factors that contribute to maintaining vitality and resilience, and to assess specific support needs.

### *Results*

Data-analysis of the focus groups and individual interviews resulted in a thematic map of the factors that contribute to maintaining resilience and vitality. The map stretches over two axes: one ranging from a healthy basis to adequate professional functioning and the other from individual to organisation, resulting in four quadrants: recharge and recover (healthy basis, individual), safety and connectedness at work (healthy basis, organisational), collaboration (professional functioning, organisational) and professional identity (professional functioning, individual).

### *Conclusion*

Areas for organisational support strategies to increase vitality and resilience among healthcare professionals are: consistent communication, realistic job performance expectations, monitor and improve mental resilience, showing appreciation and act upon practical support requests.

1  
2  
3 49 *Keywords*

4  
5 50 COVID-19, Mental Health, Qualitative Research

6  
7  
8 51

9  
10  
11 **Article summary**

12 52  
13  
14 53 *Strengths and limitations of this study*

- 15  
16 54
- 17 • This study goes beyond merely assessing stress and mental health complaints of healthcare  
18 professionals during the COVID-19 pandemic.
  - 19 55
  - 20 56
  - 21 • A qualitative design was applied to study the specific support needs of healthcare  
22 professionals.
  - 23 57
  - 24 58
  - 25 • Study insights are summarized in two concise thematic maps, which suggest feasible  
26 interventions to meet healthcare professionals' support needs.
  - 27 59
  - 28 • However, the effectiveness of the proposed interventions has not been tested yet.
  - 29 60
  - 30 • The study protocol intended a mixed-method design, however, the survey response rate was  
31 not sufficient to draw valid conclusions, therefore these results were omitted from reporting.  
32 61  
33 62  
34 63
- 35  
36  
37  
38  
39  
40  
41  
42  
43  
44  
45  
46  
47  
48  
49  
50  
51  
52  
53  
54  
55  
56  
57  
58  
59  
60

## Introduction

The Coronavirus Disease 2019 (COVID-19) pandemic had a significant impact on the physical and mental functioning of healthcare professionals[1-6]. The need for high-intensity medical care rapidly increased during the COVID-19 pandemic, resulting in stressful work circumstances[7]. First, at the departments in direct contact with COVID-19 patients, professionals were confronted with the intensity of continuously wearing personal protective equipment, changes in responsibilities and tasks, moral dilemmas, and the risk of infection for the healthcare professionals themselves and consequently their families[8-16]. Interpersonal contact with patients' family members, one of the core features of the professional practice of nurses, was dramatically reduced due to visiting limitations in most hospitals[17, 18]. This sudden shift in activities and responsibilities required additional competences to maintain high-quality healthcare. Second, professionals at non-COVID-19 departments were confronted with a sudden change of or reduction in tasks, as all focus was on the COVID-19 departments. This resulted in delay of treatment of non-COVID-19 healthcare problems and scheduled appointments including increased waiting times[19-21]. Third, the COVID-19 pandemic not only impacted the healthcare workers within hospitals, but also hospital workers who suddenly had to work from home. In addition to the temporary loss of the work environment and direct contact with colleagues, homeworkers might lack a sense of purpose, solidarity and valuable contribution to the crisis situation[22].

In the short-term, work-related stressors can cause fatigue, sleep disorders, mistakes and moral distress[23]. Long-term effects of high work pressure include burnout, depression and post-traumatic stress disorder, which may result in dropout due to sick leave or abandonment of paid employment[24-26]. These adverse outcomes can be counterbalanced by vitality, resilience and job satisfaction of professionals[27, 28]. Strengthening of these aspects may positively influence healthcare professionals' retention for work, which may be even more necessary in times of crisis[29-



1  
2  
3 88 31]. Therefore, the aim of the current study is to gain insight in the factors that benefit vitality and  
4  
5 89 resilience, to develop and direct support strategies that meet healthcare professionals' needs.  
6  
7  
8 90

## 91 **Methods**

### 92 **Study design**

93 A qualitative design was applied. The study consisted of focus groups and individual interviews,  
94 carried out in the Erasmus University Medical Center, a large academic hospital in the Netherlands  
95 with 16,485 employees and 1,125 beds, located in the second largest city of the Netherlands and one  
96 of the leading national hospitals in the COVID-19 related care. There were 68 ICU beds, of which half  
97 were taken by COVID-19 patients, and two clinics with together 42 beds, with in total 34 COVID-19  
98 patients admitted at the time the study was conducted (reference date November 2, 2020). The  
99 study protocol was previously published[32]. The study was originally set up as a mixed-methods  
100 study. It was foreseen that a sufficient number of hospital workers would respond to in-company  
101 announcements to fill out an online survey. In practice, the number of respondents was lower than  
102 expected (<5% of the employees), and no 'random' selection could be made in such a way that  
103 results would be representative. Therefore, we only report the results of the qualitative component  
104 of the planned study. The study was conducted in October and November 2020, during the second  
105 wave of the COVID-19 pandemic. The study was supported by the Hospital Board of Directors and  
106 approved by the Erasmus MC Medical Ethics Committee (MEC-2020-0705).

### 107 **Patient and Public Involvement**

108 Patients and the public were not involved in the design and conduct of this study.

### 109 **Participants**

110 Intended groups for the focus groups were: professionals from the intensive care unit (ICU), the  
111 COVID-19 department, the infection prevention unit and workers of the facility management  
112 services. Participants were selected and invited by the research team in collaboration with the team-

1  
2  
3 113 or division managers. Intended group size was six to ten participants. Participation was voluntary and  
4  
5 114 all participants provided written informed consent and filled out a short questionnaire on  
6  
7 115 demographic variables. Focus groups were led by LK, with the support of MM. Both are female senior  
8  
9  
10 116 investigators with a background in psychology. Both are clinicians as well, one in the field of  
11  
12 117 psychiatry (LK) and the other in the field of ICU nursing (MM).

### 14 118 **Measures**

16  
17 119 Based on the literature, a topic list was created to guide and structure the focus group meetings (S1  
18  
19 120 Appendix). The two main questions were: 1. "Which factors contribute to maintaining or regaining  
20  
21 121 vitality and resilience, during the second COVID-19 wave?" 2. "Based on the factors just mentioned,  
22  
23 122 what would be interventions, or policies, that are appropriate to your needs (in terms of maintaining  
24  
25 123 resilience and vitality)?" So the second question build upon the answers given to the first question.  
26  
27  
28 124 For each of the two main questions, the answers were further explored to gain understanding of why  
29  
30 125 / what caused that the factors or interventions mentioned were so important for maintain vitality  
31  
32 126 and resilience. Prior to each meeting, participants provided written informed consent and filled out a  
33  
34  
35 127 short questionnaire on demographic variables.

### 37 128 **Data analysis**

39 129 Focus groups and interview data were analysed by means of thematic analysis[33]. This method  
40  
41 130 allows for a detailed and rich description and organisation of the data and investigation of patterns of  
42  
43  
44 131 response or meaning within the dataset. Our analysis takes an essentialist, semantic approach, and  
45  
46 132 combined inductive and deductive analysis. To start with, the focus groups and individual interview  
47  
48 133 data were audiotaped and transcribed verbatim by an external professional organisation for  
49  
50 134 interview transcription in healthcare. Next, two researchers (MV and LK) read the transcripts in detail  
51  
52  
53 135 and performed preliminary manual coding of the transcripts. Each one of them individually  
54  
55 136 developed a list of preliminary (sub)themes. They made use of mind maps (MV) and tables (LK) to  
56  
57 137 organise the data. After that, they compared and discussed both their lists until agreement on one  
58  
59 138 single analysis framework. Only after that, one researcher (MV) coded all transcripts line by line,  
60

1  
2  
3 139 according to the coding framework in NVivo V.12 software. Memos for comments were used during  
4  
5 140 coding. In case the code 'other' was used for a specific text fragment, these fragments were  
6  
7 141 discussed by both researchers and assigned to a new or existing subtheme best reflecting the  
8  
9 142 contents of the otherwise uncategorised text fragment. During and after coding, the two researchers  
10  
11  
12 143 met regularly to review and check the (sub)themes for internal homogeneity and external  
13  
14 144 heterogeneity. The two researchers examined each (sub)theme for its interrelation with other  
15  
16 145 (sub)themes. Based on this analysis, overarching themes were defined to come to a coherent  
17  
18 146 account and accompanying narrative of the data to answer each of the two research questions.  
19  
20  
21 147

## 25 148 **Results**

### 28 149 **Demographics**

30 150 Six focus groups were held with intensivists, infection prevention experts, assistant infection  
31  
32  
33 151 prevention experts, nurses of COVID-19 wards, physicians COVID-19 departments (pulmonologists  
34  
35 152 and internist / infectiologists) and workers from the facility management services. It proved difficult  
36  
37 153 to invite sufficient numbers of healthcare workers at the same time to meet the intended group  
38  
39 154 sizes, due to the high workload these professionals faced during the second COVID-19 wave. We  
40  
41  
42 155 therefore reduced the group size to four to eight participants and included an extra focus group  
43  
44 156 (facility management services). Because of the high workload and time constraints, the scheduled  
45  
46 157 focus group interview with ICU nurses was replaced by three individual interviews. Due to the limited  
47  
48 158 number of medical microbiologists, the focus group has been replaced by two individual interviews.  
49  
50  
51 159 All interviews were conducted by LK. A total of 38 professionals participated in the focus groups and  
52  
53 160 interviews (see table 1).  
54  
55  
56  
57  
58  
59  
60

1  
2  
3 **Table 1.** Demographic data participant focus groups (N=38).  
4

|                                       | N  |
|---------------------------------------|----|
| <b>Gender</b>                         |    |
| Male                                  | 11 |
| Female                                | 27 |
| <b>Age (in years)</b>                 |    |
| <25                                   | 1  |
| 26-35                                 | 10 |
| 36-45                                 | 11 |
| 46-55                                 | 6  |
| 56>                                   | 10 |
| <b>Function</b>                       |    |
| Physician                             | 13 |
| Nurse                                 | 7  |
| Expert infection prevention assistant | 8  |
| Infection prevention                  | 4  |
| Facility service worker               | 6  |

5  
6  
7  
8  
9  
10  
11  
12  
13  
14  
15  
16  
17  
18  
19  
20  
21  
22  
23  
24  
25  
26  
27  
28  
29  
30  
31  
32  
33  
34  
35  
36  
37  
38  
39  
40  
41 **Factors contributing to the vitality and resilience of healthcare workers during COVID-19**

42  
43 Data-analysis resulted in four main and fourteen subthemes. The examination of each subtheme for  
44  
45 its contribution to (build or maintain) vitality and resilience, and the analysis of the cohesion and  
46  
47 inter-relations between themes according to this rationale, resulted to in a thematic map (figure 1).

48  
49 The map has two axes: one ranging from a healthy basis to adequate professional functioning and  
50  
51 the other from individual to organisation, resulting in four quadrants: recharge and recover (healthy  
52  
53 basis, individual), safety and connectedness at work (healthy basis, organisational), collaboration  
54  
55 (professional functioning, organisational) and professional identity (professional functioning,  
56  
57 individual). The themes and subthemes are described in detail below.  
58  
59  
60

1  
2  
3 172  
4  
5 173 **Recharge & recover (healthy basis, individual factors)**

6  
7 174 This theme refers to the possibility to recharge and recover from working, as this was perceived of  
8  
9  
10 175 crucial importance to continue working in the current situation but also to ensure employability in  
11  
12 176 the future. In this sense, this theme also is about the sustainability of workers and their retention for  
13  
14 177 work. Subthemes are “time-off” and “stability at home”.

15  
16 178 **Time-off.** This subtheme refers to time-off from work, but also to the expressed wish to take a break  
17  
18 179 from COVID-19 in general. Time-off could be spent in various ways, named were sports, hobbies,  
19  
20 180 time with family and time to rest. In some instances, increased time needed for recovery was  
21  
22 181 reported:

23  
24  
25 182 *“after three weeks of holiday, I thought: I can take it completely 200%! But the curve spiralled down*  
26  
27 183 *much faster than the first time, also because there are just too many other things at play that need*  
28  
29 184 *attention.... people who are ill or take care of others, but colleagues as well. Of whom you think, yes,*  
30  
31 185 *you know, when are they going to collapse?”*

32  
33  
34 186 **Stability at home.** A stable home situation was considered of extra importance during the hectic of  
35  
36 187 the pandemic. It was important as a source of joy and support, but sometimes as an extra stressor  
37  
38 188 when it comes to combining a hectic work situation with children at home school and informal care  
39  
40 189 tasks.

41  
42  
43 190 *“...in the end you want your child to be doing all right. And that just gives you peace of mind. And I*  
44  
45 191 *can work just fine if I know that my daughter is taken care off.”*

46  
47  
48  
49 192 **Safety & connectedness at work (healthy basis, organisational factors)**

50  
51 193 This theme refers to the importance of feeling safe at work, whether it is with regard to one’s own  
52  
53 194 health and sufficient protection material (subtheme “safety”), or with regard to knowing what to do  
54  
55 195 expect at work, as the absence of this can cause feelings of insecurity (subtheme “clarity”). The  
56  
57 196 subtheme “adherence to working hours” may seem a bit of an outsider here, but this subtheme is  
58  
59 197 included because limiting working over hours was perceived as a protective factor/safeguard against

1  
2  
3 198 exhaustion. This theme also refers to the importance of a sense of belonging and feeling at ease with  
4  
5 199 direct colleagues, as is covered by the subtheme “supportive team spirit”.

7 200 **Safety.** This subtheme covers several areas and included good and sufficient protective personal  
8  
9  
10 201 equipment, supervision of compliance with the COVID-19 rules by hospital staff and by visitors,  
11  
12 202 stability of the work environment and the protection of older/vulnerable staff. For instance, the  
13  
14 203 quote below is from a professional who felt unsafe at times because of a vulnerable health:

16 204 *“So that is already a pressure on me personally, that I belong to a high-risk population”.*

18 205 **Clarity.** Clarity was needed first and for all with regard to knowing which care will and will not  
19  
20  
21 206 continue, and per when. Furthermore, respondents marked clarity with regard to the division of tasks  
22  
23 207 within the team, and regarding the COVID-19- rules on the work floor as important:

25 208 *“I would like to see more clarity indeed. That you do the tasks that you are actually there for, so to  
26  
27 209 say”*

30 210 **Supportive team spirit.** This subtheme refers to a healthy basis of individual workers within the  
31  
32 211 team, and entails the importance of safety and trust within a team. It also includes a sense of  
33  
34 212 belonging and connection with team members, for instance via humour:

36 213 *“Sometimes almost morbid humour, but that is what you need to process things.”*

38 214 **Adherence to working hours.** Topics within this subtheme were: taking breaks, setting limits to  
39  
40 215 overtime and the having the possibility to take days off/vacation. These help to prevent getting over-  
41  
42 216 involved in work and to keep sufficient personal distance to work. The quote below illustrates the  
43  
44 217 difference between occasional and structural working late:

47 218 *“Yesterday I wasn't home until eight o'clock and at nine o'clock I was already behind the computer  
48  
49 219 until eleven o'clock. Yes, and this morning I was here again at 7:30 am. That's nice for once, but it just  
50  
51 220 keeps going.”*

55 221 **Collaboration (professional functioning, organisational factors)**

1  
2  
3 222 This theme is about aspects of work related to working together in a large hospital. Subthemes often  
4  
5 223 include quotes about perceived or hoped for communication and behaviour by the “the higher  
6  
7 224 management layers”, for instance about which and how expectations on work (performance) are  
8  
9  
10 225 being communicated. Subthemes within this theme are “solidarity”, “appreciation and respect”,  
11  
12 226 “practical support”, “realistic job demands” and, “sufficient amount of staff”.

13  
14  
15 227 **Solidarity.** This subtheme refers to solidarity within the team, between departments within the  
16  
17 228 hospital and between hospital regions in the Netherlands.

18  
19 229 *“I think the best thing we can learn from the first wave and what we should try to take into the*  
20  
21  
22 230 *second wave is solidarity. It's gone now. And I think that says it all.”*

23  
24 231 **Appreciation and respect.** This subtheme was defined in terms of personal attention, showing  
25  
26 232 appreciation, being trusted, realism, respect, sincere and adequate responding to answers when  
27  
28 233 asked “what do you need?”, and bonus/salary. The following quote combines several of these  
29  
30  
31 234 elements:

32  
33 235 *“Appreciation starts to feel like a trick the moment you don't support it with.... If you don't act like it.”*

34  
35 236 **Practical support.** Generic topics were: food in the department (soup, fruit), grocery shopping  
36  
37 237 service, good parking opportunities, support for childcare and timely replenishment of materials at  
38  
39  
40 238 departments. Department-specific topics were: well-equipped ICU overnight rooms, better aprons in  
41  
42 239 the ICU, work telephones with e-mail function, and good quality material for internal transport. The  
43  
44 240 quote below provides an example of generic type of practical support:

45  
46 241 *“I think what they [the hospital board] did with the delivery service of those groceries, that was a very*  
47  
48  
49 242 *good move to relieve your private life.”*

50  
51 243 **Realistic job demands.** This subtheme was the positive counterpart of a “high workload”, as this  
52  
53 244 quote below illustrates:

54  
55 245 *“But what seriously threatens vitality and resilience, I think, is the fact that now you are also expected*  
56  
57  
58 246 *to keep the plates spinning. And if you think logically, you just can not. ”*

59  
60 247 **Sufficient amount of staff.** This was a recurrent topic throughout all layers of the organisation; from

1  
2  
3 248 structural secretarial support to medical specialists. An example is the following quote:

4  
5 249 *“You want to be able to do your job well. And if the shortness of staff forces you to deliver poor*  
6  
7 250 *quality work, that's just not in your nature”*

8  
9  
10 251 **Professional identity (professional functioning, individual factors)**

11  
12 252 This theme refers to the more individualistic work-related aspects that contribute to staying vital at  
13  
14 253 work. Subthemes refer to the possibility to grow in one's work (subtheme “professional  
15  
16 254 development”), various aspects of professional autonomy (subtheme “autonomy”), and personal  
17  
18 255 beliefs on and values in how one's work-related tasks should be carried out (subtheme “work  
19  
20 256 ethos”).

21  
22  
23 257 **Professional development.** This subtheme refers to the opportunity to continue academic tasks and  
24  
25 258 career development next to providing patient care during COVID-19, and access to professional  
26  
27 259 training and education, as the quote below shows:

28  
29  
30 260 *“You now face situations that you would probably not have faced normally during your career as*  
31  
32 261 *resident, so you may also learn things from that.”*

33  
34 262 **Autonomy.** Autonomy in job performance, for example about the timing of breaks and working from  
35  
36 263 home was considered important to persevere harsh working circumstances. This subtheme also  
37  
38 264 referred to respect for the autonomy from specific occupational groups. The quote below illustrates  
39  
40 265 the importance of autonomy, and was said in the context were workers were repeatedly reminded  
41  
42 266 not to use too many face masks because of scarcity:

43  
44  
45 267 *“ It feels like you're being reprimanded, like a little kid. As if you can't bear the responsibility yourself.*  
46  
47 268 *It's really not that I walk with a mask for fun...”*

48  
49  
50 269 **Work ethos.** This subtheme refers to delivering quality, achieving success, being able to contribute,  
51  
52 270 pleasure in work, curiosity, facing challenges, being meaningful. People find satisfaction and self-  
53  
54 271 esteem in the fact that they can do their work in a high-quality way. If this is not possible, for  
55  
56 272 whatever reason, this has a negative impact on resilience and vitality, as this quote shows:

57  
58  
59 273 *“Look, as of my profession, I have seen many patients dying and that is what it is, provided you have*  
60



1  
2  
3 274 *done everything you can do. But if you get the feeling that you have fallen short and that perhaps in*  
4  
5 275 *another era, that patient would have survived, that is a feeling you may have for a while, but you*  
6  
7 276 *should not have for too long..."*  
8  
9

10  
11 277

### 12 13 14 15 278 **Organisational interventions that could contribute to vitality and resilience**

16  
17 279 Analysis of the focus group and interview data on which interventions would benefit the vitality and  
18  
19 280 resilience of healthcare workers resulted in three main themes, all referring to areas for  
20  
21 281 organisational support strategies to increase vitality and resilience among professionals:  
22  
23 282 communication and expectations related to COVID-19; monitor and improve the mental resilience of  
24  
25 283 workers; and appreciation: sincerity and practical support. The thematic map is presented in figure 2,  
26  
27 284 and the main themes with their subthemes are addressed the text below.  
28  
29

30  
31 285

### 32 33 286 **Communication and expectations related to COVID-19**

34  
35 287 During this second COVID-19 wave, there was a clear informational need among respondents, for  
36  
37 288 instance with regard to the downscaling of regular care and upscaling of COVID-19 care.  
38  
39 289 Furthermore, consistency in communication was felt to be important: getting different messages is  
40  
41 290 confusing and may even lead to a decreased support for organisational policy. In addition to making  
42  
43 291 decisions and communicating these, respondents felt it was important for the higher management  
44  
45 292 to have realistic expectations. It was perceived unrealistic to continue all care at the same pace  
46  
47 293 during the persisting pandemic. Long-term investment in COVID-19 care was suggested as an option  
48  
49 294 to combat ad hoc organisation of this type of care. This was thought to potentially benefit the  
50  
51 295 continuity of personnel, quality and professional development opportunities.  
52  
53

### 54 55 296 **Monitor and improve mental resilience**

56  
57 297 First, we found that professionals derive support and strength from contact with their colleagues.  
58  
59 298 Second, although the availability of mental support teams were positively valued, few made use of  
60

1  
2  
3  
4  
5  
6  
7  
8  
9  
10  
11  
12  
13  
14  
15  
16  
17  
18  
19  
20  
21  
22  
23  
24  
25  
26  
27  
28  
29  
30  
31  
32  
33  
34  
35  
36  
37  
38  
39  
40  
41  
42  
43  
44  
45  
46  
47  
48  
49  
50  
51  
52  
53  
54  
55  
56  
57  
58  
59  
60

299 them. At the same time respondents indicated that such help would be beneficial for others. Triage  
300 in offering mental support is required: easy accessible and at team level when possible, but with the  
301 option for rapidly scaling up to individual professional help when needed. Further, it was noted that  
302 the fulfilment of basic human needs, such as safety and rest, also contributes to professionals'  
303 mental resilience. Professionals who are feeling unsafe or depleted from energy do not have their full  
304 capacity to perform on work related tasks that require focus, decision making capacities and  
305 emotional stability.

### **Appreciation: sincerity and practical support**

306 Feeling appreciated and supported by management and/or co-workers was described as important  
307 for maintaining vitality. When it comes to expressing appreciation, it was felt important that this was  
308 done in a sincere and person-directed manner. Respondents were adverse to compliments just for  
309 the sake of compliments, and in those situations compliments sorted adverse effect. In addition, our  
310 results showed that the need for appreciation existed through all organisational layers, so not only  
311 along top-down lines but also vice versa and horizontally. Further, it was mentioned that when  
312 managers informed on what they could do to help, they should also be reliable in the follow-up to  
313 the responses given. In this sense practical support, be it upon specific requests or in general was  
314 also experienced as an expression of appreciation. A specific type of practical support mentioned was  
315 support in terms of attracting new personnel to alleviate work pressure.

## **Discussion**

319 Data-analysis resulted in a thematic map of the factors that contribute to maintaining resilience and  
320 vitality in healthcare professionals during the COVID-19 pandemic. This map was derived by inductive  
321 analysis of our focus groups and interviews data. However, reflecting upon our map, one may note  
322 resemblance with existing theories in organisational and clinical psychology[34, 35]. In this respect, it  
323 may be helpful to examine our findings in conjunction with the Job Demands-Resources model of

1  
2  
3 324 burnout[35]. This model discerns job demands and job resources. Job demands refer to “those  
4  
5 325 physical, social, or organisational aspects of the job that require sustained physical or mental effort  
6  
7 326 and are therefore associated with certain physiological and psychological costs”. As described in the  
8  
9  
10 327 introduction, working during the COVID-19 pandemic comes with a number stressors[7-15, 17, 18],  
11  
12 328 that add to the already existing job demands. High job demands are related to exhaustion[35], a core  
13  
14 329 symptom of burnout. Indeed, our findings as well as those of other studies and guidelines underline  
15  
16 330 the importance of getting enough rest and having the opportunity to recharge[36-38]. Job resources  
17  
18 331 present the other side of the coin and refer to “those physical, psychological, social, or organisational  
19  
20 332 aspects of the job that are functional in achieving work goals; reduce job demands at the associated  
21  
22 333 physiological and psychological costs; and stimulate personal growth and development”. In this way,  
23  
24 334 one could say that our findings as presented in figure 1 represent the resources that were considered  
25  
26 335 important by the participants. Interestingly, our findings here are largely covered by the five domains  
27  
28 336 of basic human needs as discerned in schema- focused therapy[34], a widely -used type of  
29  
30 337 psychotherapy. These domains are: attachment and security; autonomy; competence and identity;  
31  
32 338 freedom to express important needs and feelings; spontaneity and play, and realistic boundaries and  
33  
34 339 self-control. Sufficient resources are needed to cope with environmental demands and meet  
35  
36 340 personal professional standards in job performance. If this is not the case, an individual may respond  
37  
38 341 with reduced motivation and finally job withdrawal as a means to protect oneself against future  
39  
40 342 frustration and (perceived) failure[35]. This underlines the importance for organisations to invest in  
41  
42 343 retaining the resources of and for their healthcare workers. Our findings offer insight in the most  
43  
44 344 important resources in this respect (figure 1) and the areas for organisational interventions (figure 2).  
45  
46 345 Results from the focus groups and interviews showed that both practical and team support were  
47  
48 346 valued highly in the support needs of healthcare professionals during COVID-19. With regard to  
49  
50 347 support from the managers, it was emphasised that this support should be sincere and that both  
51  
52 348 listening to and acting upon expressed needs were important. These findings are in line with findings  
53  
54 349 from other recent studies[39-42]. Of particular interest here is the study by Bennett et al. (2020),  
55  
56  
57  
58  
59  
60

1  
2  
3  
4  
5  
6  
7  
8  
9  
10  
11  
12  
13  
14  
15  
16  
17  
18  
19  
20  
21  
22  
23  
24  
25  
26  
27  
28  
29  
30  
31  
32  
33  
34  
35  
36  
37  
38  
39  
40  
41  
42  
43  
44  
45  
46  
47  
48  
49  
50  
51  
52  
53  
54  
55  
56  
57  
58  
59  
60

where data of healthcare workers experience was collected through an anonymous website[42].

Results of this study showed that lack of support by the senior management severely impacted upon professionals' well-being and motivation. Similarly, the study by Dopelt et al. (2021), found that a lack of recognition and appreciation led to frustration and disappointment in healthcare workers[16].

Next to support by managers, team support and bonding turned out to be important. For this purpose, people usually reverted to natural, pre-existing bonds of trust. The power of positive team spirit and bonding should not be under-estimated: it is known from literature on major disasters that the connection between members from the same group (i.e., the community), harbors strong protective and healing potential[26, 39, 43]. Further, a study by Muller et al. (2020) found that healthcare workers reported low interest in professional help and greater reliance on social support and contact; and that social support correlated with less mental health problems during the COVID-19 pandemic [44]. These findings underline the need for interventions aiming at facilitating support at the workplace, especially as these may help to identify those workers who are in need for more intensive treatment[45].

A strength of this study lies in the succeeding of that many live focus group interviews in a short time span, wherein busy participants were both allowed and took the time to participate in his study. The fact that one of the senior investigators (MM) involved in the focus group interviews is experienced as ICU nurse is both a strength and a limitation. The strength lies in increased sensitivity to issues at stake at an ICU-ward. A limitation however may be potential difficulty to take an outsider position. Therefore, interviews with ICU nurses where held by LK solely. Another limitation of this study is the selection of focus groups, which included frontline healthcare workers only. Overall outcomes would be more generalizable if we also had included groups of homeworkers and professionals from non-COVID departments. Another limitation of this study concerns the low response rate on the survey. Consequently, no 'random' selection could be made for the quantitative study, and reporting these results would evoke questions about the representativeness of the results. We therefore could not report this study as a mixed-methods study, as was originally intended.

1  
2  
3 376 Furthermore, these results are obtained at a large academic hospital in Western Europe, and results  
4  
5 377 therefore cannot be generalized, as perceptions and values of professionals may differ according to  
6  
7  
8 378 culture and context.  
9  
10

## 11 379 12 13 14 15 380 **Conclusion**

16  
17  
18  
19 381 This study provides insight in the specific support needs of healthcare workers during the COVID-19  
20  
21 382 pandemic. Our results point towards the importance of clear and consistent communication, realistic  
22  
23 383 job performance expectations, the monitoring and improvement of mental resilience, showing  
24  
25 384 sincere appreciation and acting upon practical support requests. Consequently, organisational  
26  
27  
28 385 interventions to monitor and promote vitality and resilience among healthcare professionals during  
29  
30 386 the COVID-19 pandemic should focus on these particular topics.  
31  
32  
33  
34 387

## 35 36 37 388 **Funding**

38  
39  
40 389 This work was internally supported by the board of Erasmus MC (no grant number applicable), which  
41  
42 390 had no role in the design of this study and has no role in its execution, analysis and interpretation of  
43  
44 391 data.  
45  
46

## 47 392 **Competing interest**

48  
49 393 The authors declare no conflicts of interest.  
50  
51

## 52 394 **Author contributions**

53  
54  
55 395 LK: study design, data collection, data analysis, writing of the paper

56  
57 396 MV: data collection, data analysis, writing of the paper

58  
59 397 KOH: review of the paper  
60

1  
2  
3  
4  
5  
6  
7  
8  
9  
10  
11  
12  
13  
14  
15  
16  
17  
18  
19  
20  
21  
22  
23  
24  
25  
26  
27  
28  
29  
30  
31  
32  
33  
34  
35  
36  
37  
38  
39  
40  
41  
42  
43  
44  
45  
46  
47  
48  
49  
50  
51  
52  
53  
54  
55  
56  
57  
58  
59  
60

398 TKP: review of the paper

399 AP: review of the paper

400 WH: study design, review of the paper

401 JB: study design, review of the paper

402 MM: study design and protocol, data collection, review of the paper

403 **Acknowledgements:** The authors would like to thank all the participating respondents for their  
404 involvement in the study.

405 **Availability of data and materials:** Anonymized data gathered and analysed during the current study  
406 are not publicly available due to legal and ethical restrictions. These data can be requested from the  
407 corresponding author at a reasonable request by scientists wishing to use them for non-commercial  
408 purposes.

409 **Word count:** 4224

410

## References

1. Azoulay E, De Waele J, Ferrer R, et al. Symptoms of burnout in intensive care unit specialists facing the COVID-19 outbreak. *Annals of intensive care* 2020;10(1):1-8.
2. Kok N, Hoedemaekers A, van der Hoeven H, et al. Recognizing and supporting morally injured ICU professionals during the COVID-19 pandemic. *Intensive Care Medicine* 2020.
3. Pappa S, Ntella V, Giannakas T, et al. Prevalence of depression, anxiety, and insomnia among healthcare workers during the COVID-19 pandemic: A systematic review and meta-analysis. *Brain, behavior, and immunity* 2020.
4. Lai J, Ma S, Wang Y, et al. Factors associated with mental health outcomes among health care workers exposed to coronavirus disease 2019. *JAMA network open* 2020;3(3):e203976-e76.
5. Solms L, van Vianen AEM, Theeboom T, et al. Keep the fire burning: a survey study on the role of personal resources for work engagement and burnout in medical residents and specialists in the Netherlands. *BMJ open* 2019;9(11).
6. Prins JT, Hoekstra-Weebers J, Van De Wiel HBM, et al. Burnout among Dutch medical residents. *International journal of behavioral medicine* 2007;14(3):119-25.
7. Trappenburg J, Bleijenberg N, Cate D, et al. Co-Fit: Behoud van korte en lange termijn fysieke/mentale gezondheid en inzetbaarheid van zorgprofessionals blootgesteld aan Covid-19 crisis werkomstandigheden.: UMCU/HU/THINC, 2020.
8. Gold JA. Covid-19: adverse mental health outcomes for healthcare workers: British Medical Journal Publishing Group, 2020.
9. Maunder R, Hunter J, Vincent L, et al. The immediate psychological and occupational impact of the 2003 SARS outbreak in a teaching hospital. *Cmaj* 2003;168(10):1245-51.
10. Ulrich CM. Ebola is causing moral distress among African healthcare workers. *Bmj* 2014;349:g6672.

1  
2  
3  
4  
5  
6  
7  
8  
9  
10  
11  
12  
13  
14  
15  
16  
17  
18  
19  
20  
21  
22  
23  
24  
25  
26  
27  
28  
29  
30  
31  
32  
33  
34  
35  
36  
37  
38  
39  
40  
41  
42  
43  
44  
45  
46  
47  
48  
49  
50  
51  
52  
53  
54  
55  
56  
57  
58  
59  
60

- 435 11. Wu P, Fang Y, Guan Z, et al. The psychological impact of the SARS epidemic on hospital employees  
436 in China: exposure, risk perception, and altruistic acceptance of risk. *The Canadian Journal of*  
437 *Psychiatry* 2009;54(5):302-11.
- 438 12. Bukhari EE, Temsah MH, Aleyadhy AA, et al. Middle East respiratory syndrome coronavirus  
439 (MERS-CoV) outbreak perceptions of risk and stress evaluation in nurses. *The Journal of*  
440 *Infection in Developing Countries* 2016;10(08):845-50.
- 441 13. Zhu Z, Xu S, Wang H, et al. COVID-19 in Wuhan: Immediate Psychological Impact on 5062 Health  
442 Workers. *MedRxiv* 2020.
- 443 14. Xiao H, Zhang Y, Kong D, et al. The effects of social support on sleep quality of medical staff  
444 treating patients with coronavirus disease 2019 (COVID-19) in January and February 2020 in  
445 China. *Medical science monitor: international medical journal of experimental and clinical*  
446 *research* 2020;26:e923549-1.
- 447 15. Zhang Y, Wang C, Pan W, et al. Stress, burnout, and coping strategies of frontline nurses during  
448 the COVID-19 epidemic in Wuhan and Shanghai, China. *Frontiers in psychiatry* 2020;11:1154.
- 449 16. Dopelt K, Bashkin O, Davidovitch N, et al. Facing the Unknown: Healthcare Workers' Concerns,  
450 Experiences, and Burnout during the COVID-19 Pandemic—A Mixed-Methods Study in an  
451 Israeli Hospital. *Sustainability* 2021;13(16):9021.
- 452 17. Bagnasco A, Zanini M, Hayter M, et al. COVID 19—A message from Italy to the global nursing  
453 community. *Journal of Advanced Nursing* 2020.
- 454 18. Murthy S, Gomersall CD, Fowler RA. Care for critically ill patients with COVID-19. *Jama*  
455 2020;323(15):1499-500.
- 456 19. Strong SM, Magama Z, Mallick R, et al. Waiting for myomectomy during the COVID-19 pandemic:  
457 The vicious cycle of psychological and physical trauma associated with increased wait times.  
458 *International Journal of Gynecology & Obstetrics* 2020;151(2):303-05.



- 1  
2  
3 459 20. Beisani M, Vilallonga R, Petrola C, et al. Effects of COVID-19 lockdown on a bariatric surgery  
4  
5 460 waiting list cohort and its influence in surgical risk perception. *Langenbeck's archives of*  
6  
7 461 *surgery* 2020:1-8.  
8  
9  
10 462 21. Goyal N, Venkataram T, Singh V, et al. Collateral damage caused by COVID-19: Change in volume  
11  
12 463 and spectrum of neurosurgery patients. *Journal of Clinical Neuroscience* 2020;80:156-61.  
13  
14 464 22. Joly H. Lead your team into a post-pandemic world. 2020.  
15  
16 465 23. De Villers MJ, DeVon HA. Moral distress and avoidance behavior in nurses working in critical care  
17  
18 466 and noncritical care units. *Nursing Ethics* 2013;20(5):589-603.  
19  
20  
21 467 24. Moss M, Good VS, Gozal D, et al. An official critical care societies collaborative statement:  
22  
23 468 burnout syndrome in critical care health care professionals: a call for action. *American*  
24  
25 469 *Journal of Critical Care* 2016;25(4):368-76.  
26  
27  
28 470 25. Van Mol MMC, Kompanje EJO, Benoit DD, et al. The prevalence of compassion fatigue and  
29  
30 471 burnout among healthcare professionals in intensive care units: a systematic review. *PloS one*  
31  
32 472 2015;10(8):e0136955.  
33  
34  
35 473 26. Troglio da Silva FC, Neto MLR. Psychiatric disorders in health professionals during the COVID-19  
36  
37 474 pandemic: A systematic review with meta-analysis. *J Psychiatr Res* 2021:474-87.  
38  
39 475 27. van Mol MMC, Nijkamp MD, Bakker J, et al. Counterbalancing work-related stress? Work  
40  
41 476 engagement among intensive care professionals. *Australian Critical Care* 2018;31(4):234-41.  
42  
43 477 28. Schaufeli WB, Salanova M, González-Romá V, et al. The measurement of engagement and  
44  
45 478 burnout: A two sample confirmatory factor analytic approach. *Journal of Happiness studies*  
46  
47 479 2002;3(1):71-92.  
48  
49  
50 480 29. Schaufeli WB. Engaging leadership in the job demands-resources model. *Career Development*  
51  
52 481 *International* 2015.  
53  
54  
55 482 30. Bakker AB, Demerouti E, Sanz-Vergel AI. Burnout and work engagement: The JD-R approach.  
56  
57 483 2014.  
58  
59  
60

1  
2  
3  
4  
5  
6  
7  
8  
9  
10  
11  
12  
13  
14  
15  
16  
17  
18  
19  
20  
21  
22  
23  
24  
25  
26  
27  
28  
29  
30  
31  
32  
33  
34  
35  
36  
37  
38  
39  
40  
41  
42  
43  
44  
45  
46  
47  
48  
49  
50  
51  
52  
53  
54  
55  
56  
57  
58  
59  
60

- 484 31. Yu F, Raphael D, Mackay L, et al. Personal and work-related factors associated with nurse  
485 resilience: a systematic review. *International journal of nursing studies* 2019;93:129-40.
- 486 32. van Mol M, de Veer M, de Pagter A, et al. Vitality, resilience and the need for support among  
487 hospital employees during the COVID-19 pandemic: study protocol of a mixed-methods  
488 study. *BMJ open* 2021;11(10):e049090.
- 489 33. Braun V, Clarke V. Using thematic analysis in psychology. *Qualitative research in psychology*  
490 2006;3(2):77-101.
- 491 34. Young J, Klosko J, Weishaar M. Schemagerichte therapie: handboek voor therapeuten.[Scheme  
492 based therapy: Manual for therapists]. *Houten, the Netherlands: Bohn Stafleu van Loghum*  
493 2004.
- 494 35. Demerouti E, Bakker AB, Nachreiner F, et al. The job demands-resources model of burnout.  
495 *Journal of Applied psychology* 2001;86(3):499.
- 496 36. Maslow AH. A theory of human motivation. *Psychological review* 1943;50(4):370.
- 497 37. The psychological needs of healthcare staff as a result of the Coronavirus pandemic. *Br Psychol*  
498 *Soc*; 2020.
- 499 38. Chen Q, Liang M, Li Y, et al. Mental health care for medical staff in China during the COVID-19  
500 outbreak. *The Lancet Psychiatry* 2020;7(4):e15-e16.
- 501 39. Greenberg N, Docherty M, Gnanapragasam S, et al. Managing mental health challenges faced by  
502 healthcare workers during covid-19 pandemic. *bmj* 2020;368.
- 503 40. Walton M, Murray E, Christian MD. Mental health care for medical staff and affiliated healthcare  
504 workers during the COVID-19 pandemic. *European Heart Journal: Acute Cardiovascular Care*  
505 2020;9(3):241-47.
- 506 41. Feroz AS, Ali NA, Feroz R, et al. Exploring community perceptions, attitudes and practices  
507 regarding the COVID-19 pandemic in Karachi, Pakistan. *BMJ open* 2021;11(8):e048359.
- 508 42. Bennett P, Noble S, Johnston S, et al. COVID-19 confessions: a qualitative exploration of  
509 healthcare workers experiences of working with COVID-19. *BMJ open* 2020;10(12):e043949.

- 1  
2  
3 510 43. Wind TR, Komproe IH. The mechanisms that associate community social capital with post-disaster  
4  
5 511 mental health: a multilevel model. *Social science & medicine* 2012;75(9):1715-20.  
6  
7 512 44. Muller AE, Hafstad EV, Himmels JPW, et al. The mental health impact of the covid-19 pandemic  
8  
9 on healthcare workers, and interventions to help them: A rapid systematic review. *Psychiatry*  
10 513  
11  
12 514 *research* 2020:113441.  
13  
14 515 45. Tannenbaum SI, Traylor AM, Thomas EJ, et al. Managing teamwork in the face of pandemic:  
15  
16 516 evidence-based tips. *BMJ Quality & Safety* 2021;30(1):59-63.  
17  
18  
19 517

For peer review only

1  
2  
3  
4 518 **Figure legends**

5  
6  
7 519 **Figure 1.** Thematic map of factors contributing to vitality and resilience

8  
9 520 **Figure 2.** Thematic map of organisational interventions that could contribute to vitality and resilience

10  
11  
12  
13 521 **Supporting information**

14  
15  
16  
17 522 **S1 Appendix.** Topic list focus groups

For peer review only

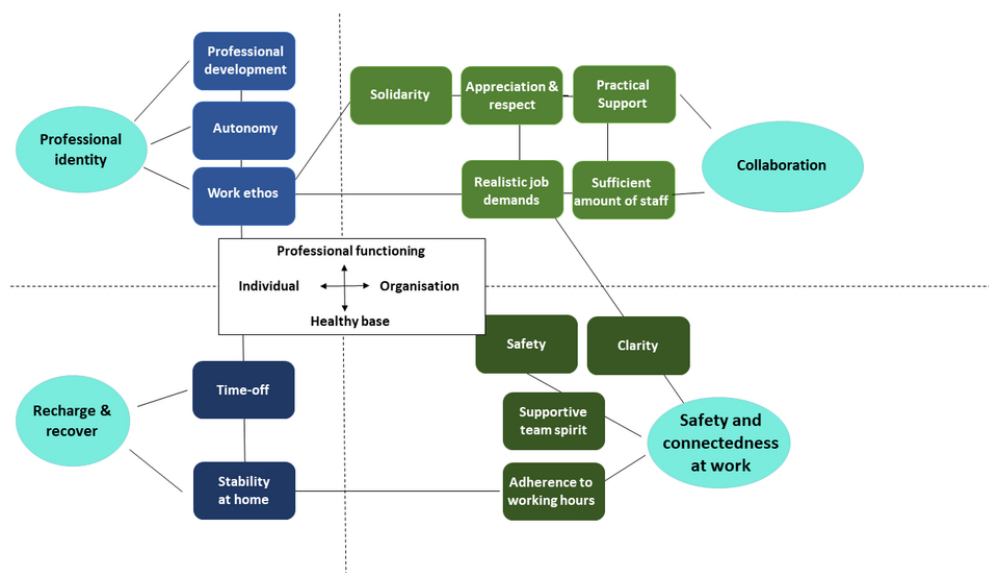

Figure 1. Thematic map of factors contributing to vitality and resilience

81x45mm (300 x 300 DPI)

1  
2  
3  
4  
5  
6  
7  
8  
9  
10  
11  
12  
13  
14  
15  
16  
17  
18  
19  
20  
21  
22  
23  
24  
25  
26  
27  
28  
29  
30  
31  
32  
33  
34  
35  
36  
37  
38  
39  
40  
41  
42  
43  
44  
45  
46  
47  
48  
49  
50  
51  
52  
53  
54  
55  
56  
57  
58  
59  
60

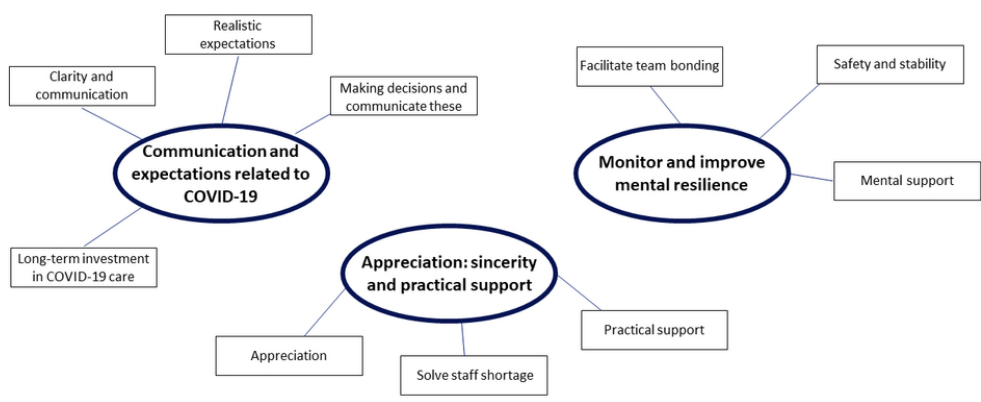

Figure 2. Thematic map of organisational interventions that could contribute to vitality and resilience

81x45mm (300 x 300 DPI)

## S1 Appendix I. Topic list focus groups

### Opening and introduction

Welcome.

Introduction and explanation of the purpose of the meeting and focus group rules.

Informed consent.

### Introductory question

What usually works for you to maintain your resilience and vitality at work? Is this different now, in the COVID-19 time period? What makes it different now? And in what sense is it different?

### Transition question

The research question contains an assumption “maintaining”. That implies that it is still there. If you look at yourself, how do you see it, is it about maintaining resilience and vitality, or is it actually about rebuilding resilience and vitality after the first COVID-19 wave?

### Key questions

Key questions cover 2 categories: 1. Factors of influence and 2. Interventions aimed at those factors

#### *1.1 Open*

Which factors contribute to maintaining your resilience and vitality at work, during the second COVID-19 wave?

Brainstorm and inventory of factors on whiteboard.

Cluster if applicable. These are various factors, you can roughly divide them into (for example, depending on outcomes): appreciation (whose? how? ), resources (staff and products), own balance (work, home, relaxation), own feeling about the situation: acceptance (vs pressure and tension), professional ethos / finding meaning etc.

#### *1.2 Further exploring*

What makes these factors contribute to your resilience and vitality? How does that work?

Then specifically, for each factor mentioned: how does it work, what makes that..... contribute to the maintenance of resilience and vitality? What are the underlying reasons (motives) for this?

#### *2.1 Open*

Using this list (factors of influence), what would be interventions, or policies, that are appropriate to your needs (in terms of maintaining resilience and vitality)?

Make an inventory of interventions on whiteboard.

## 2.2 Further exploring

How does it work that, what makes that..... would be a suitable intervention when it comes to maintaining resilience and vitality? How does that work? Would you be motivated to participate in such an intervention? What is/are your reasons/motives for this? How is that?

Note: in case the proposed interventions focus on one and the same factor, mention this and refer to the other factors mentioned earlier as well.

### Concluding questions and closing remarks

We are going to wrap up. Of all the issues discussed today, which one is the most important to you? Or: if you were to give your policy advice (on this subject) to the Board of Directors in a few sentences, what would you say?

Thank you for your contributions.



## Standards for Reporting Qualitative Research (SRQR)\*

<http://www.equator-network.org/reporting-guidelines/srqr/>

Page/line no(s).

### Title and abstract

|                                                                                                                                                                                                                                                              |                |
|--------------------------------------------------------------------------------------------------------------------------------------------------------------------------------------------------------------------------------------------------------------|----------------|
| <p><b>Title</b> - Concise description of the nature and topic of the study Identifying the study as qualitative or indicating the approach (e.g., ethnography, grounded theory) or data collection methods (e.g., interview, focus group) is recommended</p> | <p>1/1-2</p>   |
| <p><b>Abstract</b> - Summary of key elements of the study using the abstract format of the intended publication; typically includes background, purpose, methods, results, and conclusions</p>                                                               | <p>2/27-49</p> |

### Introduction

|                                                                                                                                                                     |                  |
|---------------------------------------------------------------------------------------------------------------------------------------------------------------------|------------------|
| <p><b>Problem formulation</b> - Description and significance of the problem/phenomenon studied; review of relevant theory and empirical work; problem statement</p> | <p>4-5/65-89</p> |
| <p><b>Purpose or research question</b> - Purpose of the study and specific objectives or questions</p>                                                              | <p>5/89-90</p>   |

### Methods

|                                                                                                                                                                                                                                                                                                                                                                                                             |                    |
|-------------------------------------------------------------------------------------------------------------------------------------------------------------------------------------------------------------------------------------------------------------------------------------------------------------------------------------------------------------------------------------------------------------|--------------------|
| <p><b>Qualitative approach and research paradigm</b> - Qualitative approach (e.g., ethnography, grounded theory, case study, phenomenology, narrative research) and guiding theory if appropriate; identifying the research paradigm (e.g., postpositivist, constructivist/ interpretivist) is also recommended; rationale**</p>                                                                            | <p>6/130-133</p>   |
| <p><b>Researcher characteristics and reflexivity</b> - Researchers' characteristics that may influence the research, including personal attributes, qualifications/experience, relationship with participants, assumptions, and/or presuppositions; potential or actual interaction between researchers' characteristics and the research questions, approach, methods, results, and/or transferability</p> | <p>6/116-118</p>   |
| <p><b>Context</b> - Setting/site and salient contextual factors; rationale**</p>                                                                                                                                                                                                                                                                                                                            | <p>5/94-99</p>     |
| <p><b>Sampling strategy</b> - How and why research participants, documents, or events were selected; criteria for deciding when no further sampling was necessary (e.g., sampling saturation); rationale**</p>                                                                                                                                                                                              | <p>5/-6111-116</p> |
| <p><b>Ethical issues pertaining to human subjects</b> - Documentation of approval by an appropriate ethics review board and participant consent, or explanation for lack thereof; other confidentiality and data security issues</p>                                                                                                                                                                        | <p>5/106-107</p>   |
| <p><b>Data collection methods</b> - Types of data collected; details of data collection procedures including (as appropriate) start and stop dates of data collection and analysis, iterative process, triangulation of sources/methods, and modification of procedures in response to evolving study findings; rationale**</p>                                                                             | <p>6-7/119-147</p> |

|                       |                                                                                                                                                                                                                                                       |             |
|-----------------------|-------------------------------------------------------------------------------------------------------------------------------------------------------------------------------------------------------------------------------------------------------|-------------|
| 1<br>2<br>3<br>4<br>5 | <b>Data collection instruments and technologies</b> - Description of instruments (e.g., interview guides, questionnaires) and devices (e.g., audio recorders) used for data collection; if/how the instrument(s) changed over the course of the study | S1 Appendix |
| 6<br>7<br>8           | <b>Units of study</b> - Number and relevant characteristics of participants, documents, or events included in the study; level of participation (could be reported in results)                                                                        | Table 1     |
| 9<br>10<br>11<br>12   | <b>Data processing</b> - Methods for processing data prior to and during analysis, including transcription, data entry, data management and security, verification of data integrity, data coding, and anonymization/de-identification of excerpts    | 6/133-135   |
| 13<br>14<br>15<br>16  | <b>Data analysis</b> - Process by which inferences, themes, etc., were identified and developed, including the researchers involved in data analysis; usually references a specific paradigm or approach; rationale**                                 | 6-7/133-147 |
| 17<br>18<br>19<br>20  | <b>Techniques to enhance trustworthiness</b> - Techniques to enhance trustworthiness and credibility of data analysis (e.g., member checking, audit trail, triangulation); rationale**                                                                | 6-7/133-147 |

### Results/findings

|                      |                                                                                                                                                                                                   |              |
|----------------------|---------------------------------------------------------------------------------------------------------------------------------------------------------------------------------------------------|--------------|
| 23<br>24<br>25<br>26 | <b>Synthesis and interpretation</b> - Main findings (e.g., interpretations, inferences, and themes); might include development of a theory or model, or integration with prior research or theory | 7-14/150-317 |
| 27<br>28<br>29       | <b>Links to empirical data</b> - Evidence (e.g., quotes, field notes, text excerpts, photographs) to substantiate analytic findings                                                               | 8-14/164-317 |

### Discussion

|                                  |                                                                                                                                                                                                                                                                                                                                                                                                             |               |
|----------------------------------|-------------------------------------------------------------------------------------------------------------------------------------------------------------------------------------------------------------------------------------------------------------------------------------------------------------------------------------------------------------------------------------------------------------|---------------|
| 32<br>33<br>34<br>35<br>36<br>37 | <b>Integration with prior work, implications, transferability, and contribution(s) to the field</b> - Short summary of main findings; explanation of how findings and conclusions connect to, support, elaborate on, or challenge conclusions of earlier scholarship; discussion of scope of application/generalizability; identification of unique contribution(s) to scholarship in a discipline or field | 14-17/320-379 |
| 38<br>39                         | <b>Limitations</b> - Trustworthiness and limitations of findings                                                                                                                                                                                                                                                                                                                                            | 16-17/369-379 |

### Other

|                |                                                                                                                                               |            |
|----------------|-----------------------------------------------------------------------------------------------------------------------------------------------|------------|
| 42<br>43<br>44 | <b>Conflicts of interest</b> - Potential sources of influence or perceived influence on study conduct and conclusions; how these were managed | 17/394     |
| 45<br>46       | <b>Funding</b> - Sources of funding and other support; role of funders in data collection, interpretation, and reporting                      | 17/390-392 |

\*The authors created the SRQR by searching the literature to identify guidelines, reporting standards, and critical appraisal criteria for qualitative research; reviewing the reference lists of retrieved sources; and contacting experts to gain feedback. The SRQR aims to improve the transparency of all aspects of qualitative research by providing clear standards for reporting qualitative research.

1  
2  
3  
4  
5  
6  
7  
8  
9  
10  
11  
12  
13  
14  
15  
16  
17  
18  
19  
20  
21  
22  
23  
24  
25  
26  
27  
28  
29  
30  
31  
32  
33  
34  
35  
36  
37  
38  
39  
40  
41  
42  
43  
44  
45  
46  
47  
48  
49  
50  
51  
52  
53  
54  
55  
56  
57  
58  
59  
60

\*\*The rationale should briefly discuss the justification for choosing that theory, approach, method, or technique rather than other options available, the assumptions and limitations implicit in those choices, and how those choices influence study conclusions and transferability. As appropriate, the rationale for several items might be discussed together.

**Reference:**

O'Brien BC, Harris IB, Beckman TJ, Reed DA, Cook DA. **Standards for reporting qualitative research: a synthesis of recommendations.** *Academic Medicine*, Vol. 89, No. 9 / Sept 2014  
DOI: 10.1097/ACM.0000000000000388

For peer review only
